# Supplementary material for: Estimating the depth and evolution of intrusions at resurgentcalderas: Los Humeros (Mexico)
Source: Copernicus journal article supplement (doi:10.5194/se-2019-100), 2019-06-14
Supplement: Supplementary file [file se-2019-100-AC1-supplement.pdf]

# 1 **Estimating the depth and evolution of intrusions at resurgent** 2 **calderas: Los Humeros (Mexico)**

3 Stefano Urbani<sup>1</sup>, Guido Giordano<sup>1,2</sup>, Federico Lucci<sup>1</sup>, Federico Rossetti<sup>1</sup>, Valerio Acocella<sup>1</sup>,  
4 Gerardo Carrasco- Núñez<sup>3</sup>

5 <sup>1</sup>Dipartimento di Scienze, Università degli Studi Roma Tre, L.go S.L. Murialdo 1, I-00146 Rome, Italy

6 <sup>2</sup>CNR - IDPA c/o Università degli Studi di Milano, Via Luigi Mangiagalli, 34, 20133 Milano

7 <sup>3</sup>Centro de Geociencias, Universidad Nacional Autónoma de México, Campus UNAM Juriquilla, 76100, Queretaro,  
8 Mexico

9 *Correspondence to:* Stefano Urbani (stefano.urban@uniroma3.it)

10 **Abstract.** Resurgent calderas represent a target with high potential for geothermal exploration, as they are associated  
11 with the shallow emplacement of magma, resulting in a widespread and long lasting hydrothermal activity. Therefore,  
12 evaluating the thermal potential of resurgent calderas may provide important insights for geothermal exploitation.  
13 Resurgence is classically attributed to the uplift of a block or dome resulting from the inflation of the collapse-forming  
14 magma chamber due to the intrusion of new magma. The Los Humeros volcanic complex (LHVC; Mexico), consisting  
15 of two nested calderas (the outer Los Humeros and the inner, resurgent, Los Potreros), represents an area of high  
16 interest for geothermal exploration to optimize the current exploitation of the active geothermal field. Here we aim at  
17 better define the characteristics of the resurgence in Los Potreros, by integrating field work with analogue models,  
18 evaluating the spatio-temporal evolution of the deformation and the depth and extent of the intrusions responsible for  
19 the resurgence and which may represent also the local heat source(s).

20 Structural field analysis and geological mapping show that Los Potreros area is characterized by several lava domes and  
21 cryptodomes (with normal faulting at the top) that suggest multiple deformation sources localized in narrow areas.

22 The analogue experiments simulate the deformation pattern observed in the field, consisting of magma intrusions  
23 pushing a domed area with apical **depression**. To define the possible depth of the intrusion responsible for the observed  
24 surface deformations, we apply **tested** established relations **for elliptical sources to** our experiments **with sub-circular**  
25 **sources. We found that** these relations **are independent from the source and surface dome eccentricity and** suggest  
26 that the magmatic sources responsible for the deformation **in Los Potreros are** present at very shallow depths  
27 (hundreds of meters), which is in agreement with the well data and field observations. We therefore propose that the  
28 recent deformation at LHVC is not a classical resurgence associated with the bulk inflation of a deep magma reservoir;  
29 rather this is related to the ascent of shallow (<1 km) multiple magma bodies. A similar multiple source model of the  
30 subsurface structure has been also proposed for other calderas with an active geothermal system (Usu volcano, Japan)  
31 suggesting that the model proposed may have a wider applicability.

## 32 **1 Introduction**

33 Caldera resurgence consists of the **post-collapse** uplift of part of the caldera floor. **Resurgence has been described in**  
34 **several calderas worldwide (Smith and Bailey, 1968; Elston, 1984; Lipman, 1984 and references therein),**  
35 **representing a frequent step in caldera evolution. Several mechanisms have been invoked to trigger resurgence,**  
36 **including the pressurization of the hydrothermal system (Moretti et al., 2018), regional earthquakes (Walter et**  
37 **al., 2009), and magmatic intrusion (Kennedy et al. 2012). Discriminating the contributions to the observed uplift**  
38 **of each of these mechanisms is often challenging (Acocella, 2014). However, despite the possible hydrothermal**

39 **and tectonic contributions, field observations in eroded resurgent calderas (e.g. Tomochic, Swanson and**  
40 **McDowell, 1985; Kutcharo, Goto and McPhie 2018; Turkey Creek, Du Bray and Pallister, 1999) coupled with the**  
41 **long timescale of the uplift of the caldera floor (from tens to thousands years), suggest that the intrusion of**  
42 **magmatic bodies is the prevalent mechanism for resurgence.**

43 **Resurgence is commonly** attributed to the emplacement of silicic magmas at different depth levels under limited  
44 viscosity contrasts with regard to the previously emplaced magma (Marsh, 1984; Galetto et al., 2017). **However,**  
45 **though rare, resurgence may be also triggered by the injection of more primitive magma (Morán-Zenteno et al.,**  
46 **2004; Kennedy et al., 2012) or by the emplacement of basaltic sills, as recently documented at the Alcedo caldera**  
47 **(Galapagos; Galetto et al., 2019). The shape of the intracaldera resurgent structures is variable, being**  
48 **characterized by elliptical domes with longitudinal graben(s) at the top (e.g. Toba; De Silva et al., 2015;**  
49 **Snowdonia, Beavon, 1980; Timber Mountain, Christiansen et al., 1977) or, less commonly, by sub-circular domes**  
50 **(e.g. Cerro Galan, Folkes et al., 2011; Long Valley, Hildreth et al., 2017; Grizzly Peak, Fridrich et al., 1991) with**  
51 **both longitudinal grabens (Long Valley) or concentric fault blocks (Grizzly Peak) at their top.**

52 **Whatever is the shape,** resurgence is often associated with hydrothermal and ore forming processes, since the  
53 circulation pattern and temperature gradients of geothermal fluids are structurally-controlled by the space-time  
54 distribution of faults and fractures and by the depth and shape of the magmatic sources (e.g. Guillou Frottier et al.,  
55 2000; Prinbow et al., 2003; Stix et al., 2003; Mueller et al., 2009). Therefore, the characterisation of the magma that  
56 drives resurgence (location, depth and size) and of the factors controlling the release of the heat (permeability, fracture  
57 patterns, and fluid flow) have important implications for the exploration and exploitation of renewable geothermal  
58 energy resources. In particular, the estimation of the location, depth and geometry of the magmatic sources is crucial to  
59 define the geothermal and mineral potential of resurgent calderas, allowing an economically sustainable exploration and  
60 exploitation of their resulted natural resources.

61 **The depth and size of the magmatic sources influences the deformation style of the resurgence at surface**  
62 **(Acocella et al., 2001). Deep sources (i.e. depth/diameter ratio  $\sim 1$  assuming a spherical source) are associated to**  
63 **resurgent blocks (e.g. Ischia and Pantelleria, Acocella and Funicello, 1999; Catalano et al., 2009), whereas**  
64 **shallower sources (i.e. depth/diameter ratio  $\sim 0.4$ ) to resurgent domes (e.g. Valles and Yenkahe, Kennedy et al.,**  
65 **2012; Brothelande et al., 2016). Moreover, uplift rates may change by one order of magnitude from  $\sim 1$  to  $\sim 10$  cm**  
66 **per year (e.g. Yellowstone and Iwo Jima, Chang et al., 2007; Ueda et al., 2018). Nevertheless, despite showing**  
67 **different uplift styles and rates, these natural examples share a common feature that is a coherent uplift of the**  
68 **caldera floor.**

69 This scenario differs from the occurrence of deformation patterns characterized by the widespread and delocalized uplift  
70 of several minor portions of the caldera floor, due to lava domes and/or cryptodomes, as observed at Usu volcano  
71 (Japan, Matsumoto and Nakagawa, 2010; Tomya et al., 2010). A different depth and extent of the responsible source(s)  
72 and, consequently, a different subsurface structure of the volcano is therefore suggested. A better assessment of the  
73 subsurface structure in such cases has crucial implications for geothermal exploration in order to maximize the  
74 geothermal production.

75 The Los Humeros Volcanic Complex (LHVC, Mexico) is an important geothermal target area, consisting of two nested  
76 calderas: **Los Humeros (the outer, larger and older one) and Los Potreros (the inner, smaller and younger one)**  
77 **(Fig. 1). The latter is characterized by the resurgence of its floor, which was previously** interpreted as due to uplift  
78 **processes related** to the inflation of a several km deep magma chamber (Norini et al., 2015, 2019).

79 **This paper aims at (1) evaluating** the depth **of** the intrusion(s) responsible for the uplift **in the LHVC area; (2)**  
80 explain the spatio-temporal evolution of the observed deformation of the caldera floor **and (3) test the validity of the**  
81 **linear relationship between the surface deformation structures and depth of elliptical sources (Brothelande and**  
82 **Merle 2015) for sub-circular sources.** To achieve **these** goals, we integrate results from structural field investigations  
83 carried out within the Los Potreros caldera with those derived from analogue experiments specifically designed to  
84 constrain the depth of the deformation source(s) in volcanic caldera environments. **The obtained** results **show that: (1)**  
85 **the relation between the source depth and surface deformation structures is independent from the source**  
86 **eccentricity; (2) the LHVC is characterized by** discontinuous and small-scale (**areal extent** ~ 1 km<sup>2</sup>) surface  
87 deformations generated from multiple and shallow-**emplaced** (< 1 km **depth**) magmatic bodies. These results should be  
88 taken into account for **the** planning **of** future geothermal operations at the LHVC and in other calderas showing similar  
89 surface deformation.

## 90 **2 Geological-structural setting**

91 LHVC is located at the eastern termination of the Trans Mexican Volcanic Belt (TMVB, see inset in Fig. 1). The TMVB  
92 is the largest Neogene volcanic arc in Mexico (~1000 km long and up to ~300 km wide), **commonly associated with**  
93 the subduction of the Cocos and Rivera plates beneath the North American plate along the Middle American trench  
94 (Ferrari et al., 2012, and references therein). The LHVC consists of two nested calderas formed during the Pleistocene:  
95 the outer 18 x 16 km Los Humeros caldera and the inner 10 x 8 km Los Potreros caldera (Fig. 1, Ferriz and Mahood,  
96 1984; Norini et al., 2015; Carrasco-Núñez et al., 2017b).

97 Based on updated stratigraphic and geochronological information, the evolution of the LHVC can be divided **into** three  
98 **main eruptive** stages (**Table 1**, Carrasco-Núñez et al., 2017b, 2018). Pre-caldera volcanism extended between ca. 700  
99 and 164 ka (U-Th and <sup>39</sup>Ar/<sup>40</sup>Ar datings **in** Carrasco-Núñez et al., 2018), showing evidence for an extended building  
100 phase leading to the establishment of the large volume rhyolitic reservoir, **which fed several lava domes erupted to**  
101 **the western border of the Los Humeros Caldera. A** Caldera stage started at ca. 164 ka (U-Th and <sup>39</sup>Ar/<sup>40</sup>Ar ages,  
102 **Carrasco-Núñez et al., 2018**), with the eruption of the **115 km<sup>3</sup> Xaltipan ignimbrite that triggered** the collapse of the  
103 Los Humeros caldera. **This was followed by a Plinian eruptive episodic sequence, characterized by the**  
104 **emplacement of several rhyodacitic pumice fallout layers grouped as the Faby Tuff (Ferriz and Mahood, 1984).**  
105 **The Caldera stage** ended with the eruption of the 15 km<sup>3</sup> Zaragoza rhyodacite-andesite ignimbrite at **69±16 ka**  
106 (**<sup>39</sup>Ar/<sup>40</sup>Ar ages, Carrasco-Núñez et al., 2018**) associated with the collapse of the nested Los Potreros caldera.

107 **A post-caldera stage (< 69 ka) is interpreted by** Carrasco-Núñez et al. (2018) **as composed by two main eruptive**  
108 **phases: (i) a late Pleistocene resurgent phase, characterized by the emplacement of silica-rich small domes and**  
109 **disperse explosive activity within Los Potreros caldera**, followed by **(ii) Holocene basaltic to trachytic monogenetic,**  
110 **intra-caldera and at the caldera-rim, volcanism.** This **eruptive behaviour indicates a change in the** configuration of  
111 the magmatic plumbing system **with respect to the early caldera stage of Los Humeros, which has been referred to**  
112 an unique, large and homogenized magma reservoir (e.g. Ferriz and Mahood, 1984; Verma, 1985). **It is instead** in  
113 favour of a heterogeneous multi-layered system vertically distributed in the crust, with a deep (ca. 30 km **depth**)  
114 basaltic reservoir feeding progressively shallower and smaller distinct stagnation layers, pockets and batches up to very  
115 shallow conditions (ca. 3km) (Lucci et al., under review).

116 **During the early resurgent phase of the post-caldera stage, rhyolitic domes were emplaced along the northern rim of the**  
117 Los Humeros caldera **and within the caldera at 44.8±1.7 ka (U-Th ages) and 50.7±4.4 ka (<sup>39</sup>Ar/<sup>40</sup>Ar ages),**  
118 **respectively (Carrasco-Núñez et al., 2018). This effusive activity was followed by several explosive eruptions,**

119 **which originated a dacitic air fall called Xoxoctic Tuff (0.6 km<sup>3</sup>, Ferriz and Mahood, 1984) and a pyroclastic**  
120 **sequence that includes an explosive breccia and pyroclastic flow deposits comprising the Llano Tuff (Ferriz and**  
121 **Mahood 1984; Willcox, 2011).**

122 The Holocene ring-fractures **fed** bimodal magmatism characterized by both explosive and effusive activity, producing  
123 several lava flows and domes, as well as **the** the ca. 7 ka **(C-14 age, Dávila-Harris and Carrasco-Núñez, 2014)**  
124 Cuicuiltic Member **during periods of dominant explosive activity. It consists of alternating pumices and scoriae**  
125 **erupted during contemporaneous sub-Plinian to Strombolian activity** from multiple vents located mostly along the  
126 inner **part of the caldera** and outer caldera ring faults **(Dávila-Harris and Carrasco-Núñez, 2014)**. During this phase,  
127 less evolved lavas **(trachyandesite to basalt)** were erupted within and outside Los Humeros caldera, **including the**  
128 olivine-bearing basaltic lava **that fills the previously formed** Xalapasco crater (Fig. 1). Trachytic lava flows are the  
129 most recent activity recorded **in the area, with an age of** ca. 2.8 ka **(C-14 age, Carrasco-Núñez et al., 2017b)**.

130 The reconstruction of the shallow stratigraphy **within** Los Potreros **caldera** is chiefly derived from **the analysis of**  
131 available **well-logs (Figs. 2a-b Carrasco-Núñez et al., 2017a, b)**. Overall, the **post-caldera** units are lithologically  
132 dominated by lava flows resting **on** ignimbrite deposits emplaced during caldera stage. Ignimbrites of the caldera stage  
133 rest in turn on a thick sequence dominated by andesite lavas dated at ca. 1.4-2.8 Ma **(<sup>39</sup>Ar/<sup>40</sup>Ar ages, Carrasco-Núñez et**  
134 **al., 2017a)**. The subsurface geometry of the pre- and syn-caldera products is **shown** in Figs. **2a-b, where** the in-depth  
135 geometry of the different magmatic products are cross-correlated and projected along the N-S and E-W direction,  
136 respectively. The N-S projection shows a constant depth of the top surface of the pre-caldera andesites that is associated  
137 with a highly variable depth **(down to -400 m)** of the top surface of the syn-caldera Xaltipan ignimbrite. The W-E  
138 projection shows a **higher** depth variability of both the top surface of the **pre-caldera** group **(down to -500 m** between  
139 **H-19 and H-25 wells)** and that of the Xaltipan ignimbrite **(down to -400 m** between H-19 and H-10 wells). Basaltic and  
140 rhyolitic-dacitic lavas **occur** at various depths (Carrasco-Núñez et al., 2017a); rhyolites-dacites are located mostly at the  
141 base (H-20 and H-26 wells) or within (H-05 well) the caldera group or the old andesite sequence (H-25 and H-19  
142 wells). **Basalts** are located only within the pre-caldera andesite sequence, both at its base (in contact with the limestone  
143 basement; H-5 and H-8 wells) and at its top (in contact with the base of the caldera sequence; H-10 well). **These**  
144 bimodal lava products, showing an irregular lateral distribution, **have been** interpreted as subaerial (Carrasco-Núñez et  
145 al., 2017a).

146 The **structural architecture** of the LHVC is controlled by a network of active extensional fault systems, **made** of  
147 NNW-SSE, N-S, NE-SW and E-W **striking** fault strands cutting across the Los Potreros caldera floor. **The** following  
148 main faults were recognised (Norini et al., 2015, **2019**; Calcagno et al., 2018) (Fig.1): (i) Maxtaloya (NNW-SSE  
149 striking), (ii) Los Humeros and Loma Blanca (N-S striking), (iii) Arroyo Grande (NE-SW striking), (iv) Las Viboras  
150 and Las Papas (E-W striking). Such active fault systems **are** interpreted as due to the recent/active resurgence of the Los  
151 Potreros Caldera. **Since** the faults do not show continuity beyond the caldera border, their scarps decrease in height  
152 towards the periphery of the caldera and the dip-slip displacement vectors show a semi-radial pattern (Norini et al.,  
153 2015).

154 The source of the areal uplift **has been** inferred to be the inflation of a saucer or cup shaped deep magmatic source  
155 elongated NNW-SSE, **up warping** a 8 x 4 km resurgent block, centred in the SE portion of the caldera, delimited to the  
156 W by the NNW-SSE main faults, and toward the north, east and south by the caldera rim (Fig.1, Norini et al., 2015,  
157 **2019**).

158 The seismic activity **between** 1994-2017 is clustered along the Loma Blanca, Los Humeros and Arroyo Grande faults  
159 (Lermo et al., 2018; Fig. 1). Most of the earthquakes show a magnitude (M<sub>w</sub>) between 1 and 2.5 and have been mainly

160 interpreted as induced by the geothermal exploitation activity (injection of fluids and hydrofracturing; Lermo et al.,  
161 2018). **Four major earthquakes (Mw= 3.2, 3.6, 3.9 and 4.2, at a depth of 1, 4, 2.2 and 1.8 km, respectively) have also**  
162 **been reported, with focal depths close to the trace of the active faults (Loma Blanca and Los Humeros, Fig.1). Such**  
163 **major earthquakes have been interpreted as triggered by fault reactivation due to fluid/brine circulation injected from**  
164 **geothermal wells (Lermo et al., 2018).**

### 165 **3 Methods**

166 The scientific rationale adopted in this study is based on structural field work combined with analogue models aimed to  
167 constrain the depth of the deformation sources in the caldera domain. **We also tested if the relation that constrains**  
168 **the depth of the source deformation from surface parameters adopting elliptical sources (Brothelande and Merle**  
169 **2015) is verified also for sub-circular sources.**

#### 170 **3.1 Structural field work**

171 Structural field work was carried out **on the post-caldera (late Pleistocene to Holocene) deposits to characterise** the  
172 surface deformation related to the recent activity of the Los Potreros caldera **and constrain** the morphotectonic  
173 fingerprints of the resurgence **to evaluate its source and areal extent.** The geometry and distribution of the observable  
174 faults and joints were defined at the outcrop scale by measuring their attitudes (strike and dip; right-hand rule) and  
175 spacing. Fault kinematics was assessed through classical criteria on slickensides fault surfaces, such as Riedel shears,  
176 **growth fibers** and sheltering trails (Doblas, 1998). **The published geological map (Carrasco-Núñez et al., 2017b)**  
177 **and geothermal well data has been used (Carrasco-Núñez et al., 2017a) to correlate the surface structures at a**  
178 **broader scale.**

#### 180 **3.2 Analogue models: experimental set-up and scaling**

181 **Five experiments were undertaken** simulating the ascent of a viscous **sub-circular** intrusion in a brittle overburden to  
182 test **the validity of** existing relationships between the depth of **elliptical intrusions** and the observed surface  
183 deformation (**Brothelande and Merle, 2015**). The experimental set-up (Fig. 3) consists of a 31 × 31 cm glass box filled  
184 with a sand pack (crust analogue) of variable thickness (T, of **10, 30 and 50 mm**, respectively). In each experiment we  
185 imposed a layering using a non-cohesive marine sand below a layer of crushed silica sand (grain size = 40-200 μm,  
186 cohesion = 300 Pa), fixing the thickness ratio of the two layers ( $T_w/T_l$ ) to 1, to simulate the stratigraphy in Los Potreros  
187 (stiffer post caldera lava flows above softer and less cohesive ignimbrite deposits emplaced during the caldera collapse  
188 stage). At the base of the sand pack, a piston, controlled by a **motor**, pushes upward the silicone (magma analogue)  
189 placed inside a cylinder 8 cm in diameter. The injection rate is fixed for all the experiments to 2 mm/hr and each  
190 experiment was stopped at the onset of the silicone extrusion. Both sand and silicone physical properties are listed in  
191 Table 2.

192 At the end of each experiment, the surface has been covered with sand to preserve their final topography and were  
193 **wetted** with water for cutting in sections to appreciate the subsurface deformation. Such sections were used to measure  
194 the mean dip of the **apical depression** faults ( $\theta$ ) induced by the rising silicone. A digital camera monitored the top view  
195 deformation of each experiment at 0.02 fps and a laser scanner, placed next to the camera, provided high-resolution data  
196 (maximum error  $\pm 0.5$  mm) of the vertical displacement that was used to measure in detail the geometrical features of  
197 the deformation i.e. dome diameter ( $L_d$ ), **apical depression** width ( $L_g$ ) and dome flank mean dip ( $\alpha$ ). According to the  
198 Buckingham- $\Pi$  theorem (Merle and Borgia 1996 and references therein), our models need 7 independent dimensionless

199 numbers to be properly scaled (i.e. 10 variables minus three dimensions; **Table 2**). Such dimensionless numbers can be  
200 defined as the ratios ( $\Pi$ ) listed in **Table 3**. **Some** values of  $\Pi_5$ , **representing the ratio between the inertial and viscous**  
201 **forces, are very small both in** nature and experiments ( $1.3 \times 10^{-20}$  and  $6.1 \times 10^{-10}$ , respectively), indicating that **the**  
202 **inertial forces are negligible with respect to the viscous forces** in both cases.

## 203 **4 Results**

### 204 **4.1 Structural geology**

205 The outcropping post-caldera lithologies within the Los Potreros Caldera consist of: (1) the Cuicuiltic Member, which  
206 blankets most of the surface of the upper half of the studied area; (2) basaltic lava flows filling the Xalapasco crater and  
207 the NW portion of the caldera; and (3) trachyandesitic and trachytic lava domes and thick flows extending in the  
208 southern half of the caldera and rhyolitic domes in its central part (Fig. 4). **Field work documented that** the more  
209 evolved lavas form **five nearly N-S trending** elliptical domes, **distributed in both sides of the Los Humeros Fault**  
210 (Figs. 4 and 5a): (i) a 2 km long  $\times$  1.2 km wide trachytic dome located to the west of the Maxtaloya and Los Humeros  
211 faults, (ii) a 1  $\times$  0.7 km trachyandesitic dome located **in a** northeast **area** of the Maxtaloya fault, and (iii) **one**  
212 **trachyandesitic and two obsidian smaller** domes (**0.4  $\times$  0.2 km**) **to the eastern side** of the Los Humeros **Fault** (LH-  
213 11 in Fig. 4).

214 **Field work concentrated on the three main uplifted areas** corresponding to the surface expression of the Loma  
215 Blanca, Arroyo Grande and Los Humeros faults (labelled **LH1-2**, **LH9** and **LH10** respectively in Fig. 4). The observed  
216 structures in these uplifted areas (joints and faults) affect the deposits of the post-caldera phase. Based on field  
217 evidence, we also propose a revised interpretation of the surface structures identified by previous studies (Norini et al.,  
218 2015, 2019), distinguishing between lineaments (morphological linear scarps, **with no measurable fault offsets** and/or  
219 alteration at the outcrop scale), active and inactive faults, **instead** associated with **measurable fault offsets and with**  
220 active **or** fossil **alteration**, respectively (Fig. 4). We present below a description of the structures mapped in the studied  
221 area, highlighting their temporal and spatial relationships with the **post-caldera** geological formations. We identified  
222 two inactive faults (Maxtaloya and Arroyo Grande), a morphological lineament (Las Papas) and two currently active  
223 faults (Los Humeros and Loma Blanca).

#### 224 **4.1.1 Las Papas lineament (sites LH-07, LH-08)**

225 The E-W trending Las Papas **lineament** is localised within the Cuicuiltic Member (LH-07; Fig. 5b). We identified an  
226 erosional surface along the scarp, where unaltered and undeformed Cuicuiltic **Member** rocks rest above **the Xoxoctic**  
227 **Tuff** (LH-08, Fig. 5c). The E-W trending morphological lineament **of** Las Papas **is** probably due to differential erosion  
228 of the softer layers of the pyroclastic deposits, successively blanketed by the Cuicuiltic Member.

#### 229 **4.1.2 Arroyo Grande (site LH-09) and Maxtaloya scarps**

230 The NE-SW Arroyo Grande scarp (Fig. 6a) **exposes** strongly altered and faulted (NW striking faults, mean attitude  
231  $N144^\circ/68^\circ$ , **number of data** ( $n$ ) = 8) lavas and ignimbrites unconformably covered by the unaltered Cuicuiltic Member  
232 (Fig. 6b). The **offset** observed at the outcrop-scale for the single fault strands is **ca.** 0.5 m, with a dominant normal dip-  
233 slip kinematics (pitch angle **of the slickenlines** ranging  $99^\circ$ - $106^\circ$ ). The inferred cumulative displacement at Arroyo  
234 Grande is  $\sim 10$  m. Similarly, an outcrop on the Maxtaloya scarp (in front of well H-6) shows altered trachyandesites  
235 covered by unaltered Cuicuiltic **Member** rocks (Fig. 6c).

### 236 4.1.3 Los Humeros (site LH-10)

237 The fault scarp of the N-S striking (mean attitude N174°/73°,  $n=8$ ) Los Humeros Fault **exposes** the altered portions of  
238 the Cuicuiltic Member. Fault population analysis reveals a dominant normal dip-slip (mean pitch angle **of the**  
239 **slickenlines**: 84°) kinematics, as documented by both Riedel shears and carbonate-quartz growth steps. The main fault  
240 **surface** is sutured by a trachyandesitic extrusion (Fig. 6d), localised along an aligned N-S dome (site LH-11 in Fig. 4).  
241 Moreover, ~150 m southward from the outcrop of the fault scarp, a 5 × 3 m **wide** trachyandesitic plug shows vertical  
242 striation on its surface due to a subsurface vertical flow of the trachyandesite (Fig. 6e). The observed displacement at  
243 the outcrop scale, as indicated by the height of the fault scarp, is ~ 10 m.

### 244 4.1.4 Loma Blanca (LH-01, LH-02)

245 The Loma Blanca **Fault** system (sites LH-01 and LH-02) is located in an active degassing area, where faults and  
246 fractures are frequent. The fault system **is** on top of an elongated crest (within an **apical depression**) of a morphological  
247 bulge, ~ 1 km in **width** and 30 m in height. At this location, the Cuicuiltic Member and the underlying trachyandesite  
248 lavas are strongly altered (Fig. 6f). Evidence of stockwork veining and diffuse fracturing of the lavas suggests  
249 hydrofracturing and structurally controlled fluid flow and alteration. A set of NNE-SSW striking conjugate extensional  
250 faulting and jointing (joint spacing ~0.5 m) is observed. The faults (mean attitude N26°/71°,  $n=6$ ) show a normal dip-  
251 slip kinematics (pitch **of the slickenlines** ranging 82°-104°). Joint systems found in the Cuicuiltic Member strike sub-  
252 parallel to the faults (mean attitude N37°/72°,  $n=14$ ). The inferred cumulative displacement of the faults, estimated by  
253 the depth of the apical **depression**, is ~ 5 m.

254 **In summary**, the 22 mapped faults in all the structural outcrops of the area show a main NNW-SSE strike (Fig. 6g)  
255 with a dominant dip slip movement (mean pitch angle of slickenlines 88°,  $n=16$ ) which is sub-parallel to the N-S  
256 elongation of the lava domes and the Xalapasco crater.

## 257 4.2 Experimental results

258 Here we show **three representative** experiments with increasing overburden thickness (experiments 1-3-5 with  $T=10$ ,  
259 **30 and 50 mm**). Table 4 shows the measured parameters in the experiments. **Some experiments (1-2 and 3-4) were**  
260 **replicated with the same imposed boundary conditions and show the same result, which ensures model**  
261 **reproducibility.**

262 Overall, the experiments show a similar deformation pattern: a first stage characterized by the uplift of a sub-circular  
263 dome, bordered by inward dipping reverse faults, and a second stage characterized by the subsidence of the apical part  
264 of the dome where normal faulting occurs (**apical depression** formation Fig. 7a-i). The reverse and normal faults are  
265 ring faults and are associated with the formation of radial fractures from the dome centre. **A different shape of the**  
266 **apical depression is observed with  $T/D > 0.12$ . In exp.1 ( $T/D = 0.12$ ) an annular peripheral depression formed as**  
267 **the silicone reached the surface at the edge of the cylinder (Fig.7c). Conversely, in exp. 3 and 5 ( $T/D= 0.37$  and**  
268 **0.63 respectively) a sub-circular apical depression formed as the silicone reached the surface at the centre of the**  
269 **dome (Fig.7g, m).**

270 Despite the  $T/D$  ratio, all the experiments show that both the dome diameter and **apical depression** width increase  
271 linearly with the overburden thickness (ranging from **105** to 164 mm and from **14** to 58 mm respectively, Table 4,  
272 Fig.8). The dome diameter increases abruptly with time, becoming almost constant at an early stage of the experiment  
273 (Fig.9a); the **apical depression** width shows a similar pattern even if it enlarges slightly with time (after the first abrupt

274 increase) as the silicone rises towards the surface (Fig. 9b), suggesting that the intrusion depth has a higher influence  
275 on the **apical depression** width, in agreement with Brothelande and Merle (2015).

276

## 277 5. Discussion

### 278 5.1 Interpretation of the analogue experiments

279 **The deformation pattern observed in the analogue experiments for thicker overburdens (experiments 3-4 and 5**  
280 **with  $T/D= 0.37$  and  $0.63$ ), showing a sub-circular dome and an apical depression, is in agreement with previous**  
281 **analogue experimental results (Acocella et al., 2001; Martí et al. 1994; Walter and Troll 2001). However, for**  
282 **thinner overburdens (exps. 1-2,  $T/D= 0.12$ ), we observed a new deformation pattern at the surface consisting of**  
283 **an annular peripheral depression due to the rising of the silicone at the edge of the cylinder rather than its**  
284 **centre. We infer that in these experiments, since the rising silicone was very close to the surface, the sagging of**  
285 **the sand overburden pushed downward the centre of the silicone that squeezed up at the edges of the cylinder.**  
286 **Such process may also explain the two linear grabens that formed in the experiments with elliptical sources for**  
287 **small overburden thicknesses (ratio  $T/D \sim 0.1$ , Brothelande and Merle 2015).**

288 **The deformation pattern observed in our experiments is independent with respect to the imposed strain (i.e.**  
289 **uplift) rate or the viscosity of the intruding material as suggested by the similarity with results obtained in**  
290 **previous studies with higher strain rates (Acocella and Mulugeta, 2002) or lower viscosity intruding materials**  
291 **(Galletto et al., 2017; Martí et al. 1994; Walter and Troll, 2001). On the other hand, the occurrence of an apical**  
292 **depression is dependent on the thickness (i.e. depth) of the intrusion since thin intrusions relative to their depths**  
293 **will generate sub-circular domes without any apical depression (Galland et al., 2009; Galland, 2012). Moreover,**  
294 **our results confirm that the apical depression width shows a linear correlation with the source depth (Fig. 8) as**  
295 **estimated in Brothelande and Merle (2015) for elongated sources. This evidence documents that such relation is**  
296 **independent from the source eccentricity or shape of the extensional structures at the top of the dome (i.e. linear**  
297 **graben or sub-circular depression) suggesting that any elongation of the surface structure represents only a**  
298 **minor complication of the basic deformation pattern as already pointed out by (Roche et al., 2000).**

299

### 300 5.2 Origin and extent of the resurgence in the LHVC

301 The distribution of the alteration patterns and deformation characteristics of the post caldera deposits can be used to  
302 infer the origin and extent of the uplift within the LHVC. In particular, **whether** the 7.4 ka Cuicuiltic Member **was**  
303 **involved** in the deformation and alteration allow **constraining** the spatio-temporal evolution of the surficial deformation  
304 and associated uplifts in Los Potreros. **Unaltered** and undeformed deposits of the Cuicuiltic Member crop out along the  
305 E-W Las Papas lineament and unconformably cover altered and faulted lavas and ignimbrites along the Arroyo Grande  
306 and Maxtaloya scarps. Alteration and deformation of the Cuicuiltic Member occurs along the Los Humeros Fault scarp  
307 and within the apical **depression** of the Loma Blanca bulge. **The** vertical striations of the trachyandesitic plug near the  
308 Los Humeros fault scarp suggest that the ascent of the plug induced the uplift, the normal dip-slip faulting and alteration  
309 of the Cuicuiltic **Member**.

310 **The** observations suggest that Los Potreros is not a classic resurgent caldera (i.e. a caldera characterised by a large-scale  
311 process localized in a single area) but is characterised by a discontinuous uplift process in space and time, inducing  
312 small-scale deformations at each pulse (Fig. 10a-d). In particular, it was active in the south and north-eastern sector of  
313 the caldera, at Maxtaloya and Arroyo Grande (Fig. 10a), prior to the deposition of the Cuicuiltic Member ( $\sim 7.4$  ka),  
314 and then moved towards N along the Los Humeros and Loma Blanca scarps during and post the eruption of the



315 Cuicuiltic **Member** (Fig. 10b-d). The felsic lava found at the Los Humeros Fault scarp shows a similar mineral  
316 assemblage to the felsic domes located further south (Fig. 4); thus, the Los Humeros scarp may represent the final stage  
317 (i.e. effusive eruption of felsic magmas, (Fig. 10c) of the uplift process, which is thus driven by the ascent of relatively  
318 narrow (hundreds of meters) and highly viscous felsic magma batches. This is supported by the N-S elongation of the  
319 identified lava domes which is sub-parallel to the orientation of the measured fault planes (NNW-SSE), indicating that  
320 the observed deformation is closely related to the post-caldera volcanism. The ascent of such magma bodies is inferred  
321 here to drive the recent uplift and deformation of the Loma Blanca bulge, as suggested by the active fumaroles and  
322 extensive alteration of both the Cuicuiltic **Member** and post-caldera lavas (Fig. 10d). The presence of such shallow  
323 magma bodies is also suggested by the four major earthquakes recorded in Los Potreros, which have been previously  
324 interpreted to be induced by geothermal exploitation (Lermo et al., 2018). However, since the magnitude of the seismic  
325 events induced by geothermal exploitation activities is usually lower (i.e. < 3, Evans et al., 2012 and references therein),  
326 the higher magnitude (between 3.2 and 4.2) of the earthquakes in Los Potreros suggests that they may be more likely of  
327 volcano-tectonic origin due to shallow magma emplacement.

328 To further support the above interpretation from field observations, results from the presented analogue models were  
329 used to constrain the magma source depth from the geometrical parameters measured in the experiments ( $L_g$ ,  $\theta$ ,  $\alpha$ , Table  
330 4). We calculated the theoretical overburden thickness (i.e. the intrusion depth,  $T_t$ , Table 4) as follow (Brothelande and  
331 Merle, 2015):

$$332 T_t = \frac{1}{2} L_g \times \frac{\sin(\theta + \alpha)}{\cos \theta} \quad (1)$$

333 Comparing the percentage difference ( $\sigma$ ) between the imposed experimental (T) and theoretical ( $T_t$ ) overburden  
334 thickness values, we calculate the associated error in the evaluation of the intrusion depth in the models ( $\sigma$ , Table 4,  
335 Fig. 8). We then use equation (1) for the evaluation of the heat source depth at the Loma Blanca bulge considering  $\sigma \sim$   
336 40 % (maximum value of the experiments excluding those showing an annular depression that was not observed in  
337 the field). For the Loma Blanca bulge  $L_g = 286$  m,  $\theta = 71^\circ$ ,  $\alpha = 4.5^\circ$ , the estimated intrusion depth is  $425 \pm 170$  m. Such  
338 relatively shallow depth is within the range of depths of rhyolitic-dacitic domes drilled in geothermal wells (spanning  
339 from 300 to 1700 m, Fig. 2a-b) and is consistent with the hypothesis that the uplift is driven by small and delocalized  
340 magmatic intrusions, as suggested by the field data.

341 The rhyolites-dacites have been previously interpreted of subaerial origin (Carrasco-Núñez et al., 2017a), but we  
342 suggest that at least some of them can be reinterpreted as intrusions of felsic cryptodomes based on the following  
343 considerations: (i) the occurrence of rhyolite-dacite lava bodies within the thick pre-caldera old andesite sequence is  
344 unusual and does not have a subaerial counterpart; (ii) the rhyolite body in well H-20 (Fig. 2b) up warps both the  
345 intracaldera ignimbrite sequence and the post-caldera lavas (showing a reduced thickness) indicating that the  
346 caldera forming ignimbrites do not level out the paleo-topography; and (iii) the top of the Xaltipan ignimbrite  
347 shows an higher depth variation than the pre caldera andesite (Fig. 2a) highlighting a local and discontinuous  
348 uplifting of the Xaltipan ignimbrite. Such evidence can be more easily reconciled with the intrusion of felsic  
349 cryptodomes within the volcanic sequence, rather than with a regular layer-cake stratigraphy.

350

### 351 5.3 Implications for the structure of the LHVC geothermal field

352 The combination of field and modelling data support that the uplift in Los Potreros caldera is due to multiple  
353 deformation sources in narrow areas that do not represent resurgence *sensu stricto*. Such localized recent deformation  
354 within Los Potreros caldera appears to be linked to small magmatic intrusions located at relatively shallow depths (i.e. <  
355 1 km) as in Loma Blanca, where the estimated intrusion depth calculated from the experimental data is  $425 \pm 170$  m.

356 **This** model **differs** from the general accepted idea of resurgence in Los Potreros induced by the inflation of a saucer or  
357 cup shaped deep magmatic intrusion (Norini et al., 2015, 2019). The resurgence is inferred to be centred beneath the  
358 sector of the caldera traversed by the E-W lineaments and limited by the Maxtaloya and Arroyo Grande faults (sector S1  
359 in Norini et al., 2015). The thermal anomalies identified by Norini et al. (2015) show that the temperatures are  
360 unexpectedly cold beneath the inferred centre of the resurgent block, where the highest temperatures should be  
361 expected. By contrast, sharp and narrow temperature peaks, spatially coincident with Los Humeros and Loma Blanca  
362 faults, are consistent with the presence of shallow and delocalized heat sources. Indeed, the inflation of the deep magma  
363 chamber of the LHVC, inferred to be at 5 to 7-8 km of depth (Verma, 1983, 2000, 2011) and extending 9 km in radius  
364 and 6 km in length (thus coinciding with the Los Humeros caldera rim, Verma et al., 1990), should have resulted in a  
365 much wider uplift and with higher magnitude than the one observed in the field. **Resurgence** resulting from magma  
366 remobilization of the deep chamber that produced collapse is characterized by a larger-scale surface deformation  
367 (thousands of meters of uplift extending for tens of kilometers on the surface) as shown in many large calderas  
368 worldwide (Toba, de Silva et al., 2015; Cerro Galan, Folkes et al., 2011; Ischia, Carlino, 2012).

369 It is therefore unlikely that the replenishment of new magma in the caldera forming deep magma chamber accounts for  
370 the magnitude (few tens of meters) and discontinuous spatial distribution of the deformation in Los Potreros.

371 Such **a** model of the recent uplifting in Los Potreros is supported by field-based petrographic-mineralogical analysis  
372 showing that the present-day magmatic plumbing system is characterized by multiple magma levels spanning from a  
373 deep (30-33 km) basaltic reservoir to very shallow (~ 1.5 km), **smaller**, trachyandesitic-trachytic magma batches (Lucci  
374 et al., under review).

375 A similar model of the plumbing system has been proposed to explain the eruptive activity of Usu volcano (Japan) **since**  
376 **1663**, a post caldera cone of the Toya caldera consisting of a basaltic main edifice surmounted by 3 felsic lava domes  
377 and more than 10 cryptodomes. **Petrochemical data at Usu** suggest the presence of multiple magma batches (i.e. sills)  
378 **at 0.25-2 km deep** that originated from partial melting of a metagabbro (Matsumoto and Nakagawa, 2010; Tomya et al.,  
379 2010).

380 Our proposed model has implications for planning future geothermal exploration: **siting of** future geothermal wells  
381 should consider that the presence of shallow heat sources within the caldera **may** **complicate** the pattern of isotherms  
382 associated with the deeper heat flow.

## 383 **6 Conclusions**

384 **By** integrating field work with analogue models, **we constrain** the **late Pleistocene-Holocene** spatio-temporal evolution  
385 **of volcanism of the LHVC** and estimate the depth of **the magmatic** intrusions **feeding the active** geothermal **system**.  
386 **New findings on experimental analogue models of resurgent domes are also provided.**

387 **These are the main results that can be extracted from this study:**

388 **1.** The distribution of the alteration patterns and deformation of the Cuicuiltic **M**ember suggests that the recent (post-  
389 caldera collapse) uplift in Los Potreros **caldera** moved **progressively northwards**, from the south and north-eastern  
390 sector of the caldera towards N along the Los Humeros and Loma Blanca scarps.

391 **2.** The estimated depth of the intrusions responsible for such uplift is very shallow, as calculated from the experimental  
392 data for the Loma Blanca bulge ( $425 \pm 170$  m).

393 **3.** The recent uplift in Los Potreros is discontinuous in space and time, inducing small-scale (**areal extent** ~ 1 km<sup>2</sup>)  
394 deformations originating from multiple and shallow (< 1 km **depth**) magmatic bodies, thus not representing a classic  
395 resurgent caldera, which **usually involves** large scale deformation (**areal extent of** several km<sup>2</sup>).

396 **4. The relation that relates the magmatic source depth with the surface parameters of resurgent domes is**  
397 **independent by the source eccentricity, similarly to what already verified for sub-circular intrusions.**  
398

#### 399 **Acknowledgements**

400 CFE is kindly acknowledged for allowing work on the Los Humeros geothermal field. Federico Galetto helped for laser  
401 scanner data processing. Fabio Corbi and Matteo Trolese provided technical support in building the experimental set-up.  
402 Gianluca Norini is acknowledged for logistic support in the field. Alessandra Pensa kindly helped with figure drawings.  
403 Funded by the European Union's Horizon 2020 GEMex Project (grant agreement No. 727550) and by the Mexican  
404 Energy Sustainability Fund CONACYT-SENER, WP 4.5 of the Project 2015-04-268074. More information can be  
405 found on the GEMex Website: <http://www.gemex-h2020.eu>. The Grant to Department of Science, Roma Tre University  
406 (MIUR-Italy Dipartimenti di Eccellenza, ARTICOLO 1, COMMI 314 – 337 LEGGE 232/2016) is gratefully  
407 acknowledged.  
408

#### 409 **References**

410 **Acocella, V.: Great challenges in volcanology: how does the volcano factory work?, *Front. Earth Sci.*, 2:4,**  
411 **<https://doi.org/10.3389/feart.2014.00004>, 2014.**

412 **Acocella, V., and Funicello, R.: The interaction between regional and local tectonics during resurgent doming:**  
413 **the case of the island of Ischia, Italy, *J. Volcanol. Geoth. Res.*, 88, 109-123, [https://doi.org/10.1016/S0377-](https://doi.org/10.1016/S0377-0273(98)00109-7)**  
414 **[0273\(98\)00109-7](https://doi.org/10.1016/S0377-0273(98)00109-7), 1999.**

415 **Acocella, V., and Mulugeta, G.: Experiments simulating surface deformation induced by pluton emplacement,**  
416 ***Tectonophysics*, 352, 275-293, [https://doi.org/10.1016/S0040-1951\(02\)00218-4](https://doi.org/10.1016/S0040-1951(02)00218-4), 2002.**

417 Acocella, V., Cifelli, F., and Funicello, R.: The control of overburden thickness on resurgent domes, *J. Volcanol. Geoth.*  
418 *Res.*, 111, 137–153, [https://doi.org/10.1016/S0377-0273\(01\)00224-4](https://doi.org/10.1016/S0377-0273(01)00224-4), 2001.

419 Arellano, V.M., García, A., Barragán, R.M., Izquierdo, G., Aragón, A., and Nieva, D.: An updated conceptual model of  
420 the Los Humeros geothermal reservoir (Mexico), *J. Volcanol. Geoth. Res.*, 124, 67–88, [https://doi.org/10.1016/S0377-](https://doi.org/10.1016/S0377-0273(03)00045-3)  
421 [0273\(03\)00045-3](https://doi.org/10.1016/S0377-0273(03)00045-3), 2003.

422 **Beavon, R.V.: A resurgent cauldron in the early Paleozoic of Wales, U.K., *J. Volcanol. Geoth. Res.*, 7, 157-174,**  
423 **[https://doi.org/10.1016/0377-0273\(80\)90025-6](https://doi.org/10.1016/0377-0273(80)90025-6), 1980.**

424 Brothelande, E., Peltier, A., Got, J.L., Merle, O., Lardy, M., and Garaebiti, E.: Constraints on the source of resurgent  
425 doming inferred from analogue and numerical modeling — Implications on the current feeding system of the Yenkahe  
426 dome–Yasur volcano complex (Vanuatu), *J. Volcanol. Geoth. Res.*, 322, 225–240,  
427 <https://doi.org/10.1016/j.jvolgeores.2015.11.023>, 2016.

428 Brothelande, E., and Merle, O.: Estimation of magma depth for resurgent domes: An experimental approach, *Earth*  
429 *Planet. Sc. Lett.*, 412, 143–151, <https://doi.org/10.1016/j.epsl.2014.12.011>, 2015.

430 Calcagno, P., Evanno, G., Trumpy, E., Carlos Gutiérrez-Negrín, L., Macías, J.L., Carrasco-Núñez, G., and Liotta, D.:  
431 Preliminary 3-D geological models of Los Humeros and Aocolulco geothermal fields (Mexico)-H2020 GEMex Project,  
432 *Adv. Geosci.*, 45, 321–333, <https://doi.org/10.5194/adgeo-45-321-2018>, 2018.

433 Carlino, S.: The process of resurgence for Ischia Island (southern Italy) since 55 ka: The laccolith model and  
434 implications for eruption forecasting, *B. Volcanol.*, 74, 947–961. <https://doi.org/10.1007/s00445-012-0578-0>, 2012.

435 Carrasco-Núñez, G., and Branney, M.J.: Progressive assembly of a massive layer of ignimbrite with a normal-to-reverse  
436 compositional zoning: The Zaragoza ignimbrite of central Mexico, *B. Volcanol.*, 68, 3–20,  
437 <https://doi.org/10.1007/s00445-005-0416-8>, 2005.

438 Carrasco-Núñez, G., McCurry, M., Branney, M.J., Norry, M., and Willcox, C.: Complex magma mixing, mingling, and  
439 withdrawal associated with an intra-Plinian ignimbrite eruption at a large silicic caldera volcano: Los Humeros of  
440 central Mexico, *Bull. Geol. Soc. Am.*, 124, 1793–1809, <https://doi.org/10.1130/B30501.1>, 2012.

441 Carrasco-Núñez, G., López-Martínez, M., Hernández, J., and Vargas, V.: Subsurface stratigraphy and its correlation  
442 with the surficial geology at Los Humeros geothermal field, eastern Trans-Mexican Volcanic Belt, *Geothermics*, 67, 1–  
443 17, <https://doi.org/10.1016/j.geothermics.2017.01.001>, 2017a.

444 Carrasco-Núñez, G., Hernández, J., De León, L., Dávila, P., Norini, G., Bernal, J.P., Jicha, B., Navarro, M., López-  
445 Quiroz, P., and Digitalis, T.: Geologic Map of Los Humeros volcanic complex and geothermal field, eastern Trans-  
446 Mexican Volcanic Belt, *Terra Digitalis*, 1, 1–11, <https://doi.org/10.22201/igg.terradigitalis.2017.2.24.78>, 2017b.

447 Carrasco-Núñez, G., Bernal, J.P., Dávila, P., Jicha, B., Giordano, G., and Hernández, J.: Reappraisal of Los Humeros  
448 volcanic complex by new U/Th zircon and <sup>40</sup>Ar/<sup>39</sup>Ar dating: Implications for greater geothermal potential, *Geochem.*  
449 *Geophys. Geosy.*, 19, 132–149, <https://doi.org/10.1002/2017GC007044>, 2018.

450 **Catalano, S., De Guidi, G., Lanzafame, G., Monaco, C., and Tortotici, L.: Late quaternary deformation on the**  
451 **island on Pantelleria: new constraints for the recent tectonic evolution of the Sicily Channel Rift (southern Italy).**  
452 ***J. Geodyn.* 48, 75–82, 2009.**

453 **Chang, W.L., Smith, R.B., Wicks, C., Farrell, J.M., and Puskas, C.M.: Accelerated uplift and magmatic intrusion**  
454 **of the Yellowstone Caldera, 2004 to 2006, *Science*, 318, 952–956, <https://doi.org/10.1126/science.1146842>, 2007.**

455 **Christiansen, R.L., Lipman, P.W., Carr, W.J., Byers, F.M., Orkild, P.P., and Sargent, K.A.: Timber Mountain-**  
456 **Oasis Valley caldera complex of southern Nevada, *Geol. Soc. Am. Bull.*, 88, 943–959, [https://doi.org/10.1130/0016-](https://doi.org/10.1130/0016-7606(1977)88<943:TMVCCO>2.0.CO;2)  
457 **[7606\(1977\)88<943:TMVCCO>2.0.CO;2](https://doi.org/10.1130/0016-7606(1977)88<943:TMVCCO>2.0.CO;2), 1977.****

458 Dávila-Harris, P., and Carrasco-Núñez, G.: An unusual syn-eruptive bimodal eruption: The Holocene Cuicuiltic  
459 Member at Los Humeros caldera, Mexico, *J. Volcanol. Geoth. Res.*, 271, 24–42,  
460 <https://doi.org/10.1016/j.jvolgeores.2013.11.020>, 2014.

461 de Silva, S.L., Mucek, A.E., Gregg, P.M., and Pratomo, I.: Resurgent Toba - field, chronologic, and model constraints  
462 on time scales and mechanisms of resurgence at large calderas, *Front. Earth Sci.*, 3, 1–17,  
463 <https://doi.org/10.3389/feart.2015.00025>, 2015.

464 Doblas, M.: Slickenside kinematic indicators, *Tectonophysics*, 295, 187–197, [https://doi.org/10.1016/S0040-](https://doi.org/10.1016/S0040-1951(98)00120-6)  
465 **[1951\(98\)00120-6](https://doi.org/10.1016/S0040-1951(98)00120-6), 1998.**

466 **Du Bray, E.A., and Pallister, J.S.: Recrystallization and anatexis along the plutonic–volcanic contact of the**  
467 **Turkey Creek caldera, Arizona, *Geol. Soc. Am. Bull.*, 111, 143–153, [https://doi.org/10.1130/0016-](https://doi.org/10.1130/0016-7606(1999)111<0143:RAAATP>2.3.CO;2)  
468 **[7606\(1999\)111<0143:RAAATP>2.3.CO;2](https://doi.org/10.1130/0016-7606(1999)111<0143:RAAATP>2.3.CO;2), 1999.****

469 **Elston, W.: Mid-Tertiary ash flow tuff cauldrons, southwestern New Mexico, *J. Geophys. Res.*, 89, 8733–8750,**  
470 **<https://doi.org/10.1029/JB089iB10p08733>, 1984.**

471 Evans, K.F., Zappone, A., Kraft, T., Deichmann, N., and Moia, F.: A survey of the induced seismic responses to fluid  
472 injection in geothermal and CO<sub>2</sub> reservoirs in Europe, *Geothermics*, 41, 30–54,  
473 <https://doi.org/10.1016/j.geothermics.2011.08.002>, 2012.

474 Ferrari, L., Orozco-Esquivel, T., Manea, V., and Manea, M.: The dynamic history of the Trans-Mexican Volcanic Belt  
475 and the Mexico subduction zone, *Tectonophysics*, 522–523, 122–149, <https://doi.org/10.1016/j.tecto.2011.09.018>, 2012.

476 Ferriz, H., and Mahood, G.A.: Eruption Rates and Compositional Trends at Los Humeros Volcanic Center, Puebla,  
477 Mexico, *J. Geophys. Res.*, 89, 8511-8524, <https://doi.org/10.1029/JB089iB10p08511>, 1984.

478 Folkes, C.B., Wright, H.M., R.A.F. Cas, de Silva, S.L., Lesti, C., and Viramonte, J.G.: A re-appraisal of the stratigraphy  
479 and volcanology of the Cerro Galán volcanic system, NW Argentina, *B. Volcanol.*, 73, 1427–1454,  
480 <https://doi.org/10.1007/s00445-011-0459-y>, 2011.

481 **Fridrich, C.J., Smith, R.P., DeWitt, E., McKee, E.H.: Structural, eruptive, and intrusive evolution of the Grizzly**  
482 **Peak caldera, Sawatch Range, Colorado, *Geol. Soc. Am. Bull.*, 103, 1160-1177, [https://doi.org/10.1130/0016-](https://doi.org/10.1130/0016-7606(1991)103<1160:SEAIEO>2.3.CO;2)**  
483 **[7606\(1991\)103<1160:SEAIEO>2.3.CO;2](https://doi.org/10.1130/0016-7606(1991)103<1160:SEAIEO>2.3.CO;2), 1991.**

484 Galetto, F., Acocella, V., and Caricchi, L.: Caldera resurgence driven by magma viscosity contrasts, *Nat. Commun.*, 8,  
485 1–11, <https://doi.org/10.1038/s41467-017-01632-y>, 2017.

486 **Galetto, F., Bagnardi, M., Acocella, V., and Hooper, A.: Noneruptive unrest at the caldera of Alcedo Volcano**  
487 **(Galápagos Islands) revealed by InSAR data and geodetic modelling, *J. Geophys. Res.*, 124, 3365–3381,**  
488 **<https://doi.org/10.1029/2018JB017103>, 2019.**

489 **Galland, O.: Experimental modelling of ground deformation associated with shallow magma intrusions, *Earth***  
490 ***Planet. Sc. Lett.*, 317-318, 145-156, <https://doi.org/10.1016/j.epsl.2011.10.017>, 2012.**

491 **Galland, O., Planke, S., Ragnhild Neumann, E., and Malthe-Sørensen, A.: Experimental modelling of shallow**  
492 **magma emplacement: Application to saucer-shaped intrusions, *Earth Planet. Sc. Lett.*, 277, 373-383,**  
493 **<https://doi.org/10.1016/j.epsl.2008.11.003>, 2009.**

494 **Goto, Y., and McPhie, J.: Tectonics, structure, and resurgence of the largest Quaternary caldera in Japan:**  
495 ***Kutcharo, Hokkaido, Geol. Soc. Am. Bull.*, 130, 1307-1322, <https://doi.org/10.1130/B31900.1>, 2018.**

496 Guillou-Frottier, L., Burov, E.B., and Milési, J.P.: Genetic links between ash-flow calderas and associated ore deposits  
497 as revealed by large-scale thermo-mechanical modelling, *J. Volcanol. Geoth. Res.*, 102, 339–361,  
498 [https://doi.org/10.1016/S0377-0273\(00\)00246-8](https://doi.org/10.1016/S0377-0273(00)00246-8), 2000.

499 **Hildreth, W., Fierstein, J., and Calvert, A.: Early postcaldera rhyolite and structural resurgence at Long Valley**  
500 **Caldera, California, *J. Volcanol. Geoth. Res.*, 335, 1-34, <http://dx.doi.org/10.1016/j.jvolgeores.2017.01.005>, 2017.**

501 Kennedy, B., Wilcock, J., and Stix, J.: Caldera resurgence during magma replenishment and rejuvenation at Valles and  
502 Lake City calderas, *B. Volcanol.*, 74, 1833–1847, <https://doi.org/10.1007/s00445-012-0641-x>, 2012.

503 **Lipman, P. W.: The roots of ash flow calderas in Western North America: windows into the tops of granitic**  
504 **batholiths, *J. Geophys. Res.*, 89, 8801–8841, <https://doi.org/10.1029/JB089iB10p08801>, 1984.**

505 Lermo, J., Lorenzo, C., Jiménez, N., Ramos, E., Ângulo, J., Israel, J., Téllez, N., Machado, O., Álvarez, I., Torres, R.,  
506 Alfaro R.: Analisis de la actividad sismica (1994-2016), su relacion con los pozos inyectoros y productores y aplicación  
507 de nuevas tecnicas geofisica para caracterizar las zonas anómalas del campo geotérmico de Los Humeros, CEMIE-  
508 GEO, Mexico, Internal Rep., 42 pp., 2018.

509 Lucci, F., Carrasco-Núñez, G., Rossetti, F., Theye, T., White, J. C., Urbani, S., Azizi, H., Asahara, Y., and Giordano, G.:  
510 Anatomy of the magmatic plumbing system of Los Humeros Caldera (Mexico): implications for geothermal systems,  
511 *Solid Earth Discuss.*, <https://doi.org/10.5194/se-2019-86>, in review, 2019.

512 Marsh, B.D.: On the mechanics of caldera resurgence, *J. Geophys. Res.*, 89, 8245–8251,  
513 <https://doi.org/10.1029/JB089iB10p08245>, 1984.

514 **Martí, J., Ablay, G.J., Redshaw, L.T., and Sparks, R.S.J.: Experimental studies of collapse calderas, *J. Geol. Soc.***  
515 ***London*, 151, 919-929, <https://doi.org/10.1144/gsjgs.151.6.0919>, 1994.**

516 Merle, O., Borgia, A.: Scaled experiments of volcanic spreading, *J. Geophys. Res.*, 101, 13805-13817,  
517 <https://doi.org/10.1029/95JB03736>, 1996.

518 **Morán-Zenteno, D.J., Alba-Aldave, L.A., Solé, J., and Iriondo, A.: A major resurgent caldera in southern**  
519 **Mexico: the source of the late Eocene Tilzapotla ignimbrite. *J. Volcanol. Geoth. Res.*, 136, 97–119,**  
520 **<https://doi.org/10.1016/j.jvolgeores.2004.04.002>, 2004.**

521 **Moretti, R., Troise, C., Sarno, F., and De Natale, G.: Caldera unrest driven by CO<sub>2</sub> induced drying of the deep**  
522 **hydrothermal system, *Sci. Rep. UK*, 8, <https://doi.org/10.1038/s41598-018-26610-2>, 2018.**

523 Mueller, W.U., Stix, J., Corcoran, P.L., Daigneault, R.: Subaqueous calderas in the Archean Abitibi greenstone belt: An  
524 overview and new ideas, *Ore Geol. Rev.*, 35, 4–46, <https://doi.org/10.1016/j.oregeorev.2008.12.003>, 2009.

525 Norini, G., Groppelli, G., Sulpizio, R., Carrasco-Núñez, G., Dávila-Harris, P., Pelliccioli, C., Zucca, F., and De Franco,  
526 R.: Structural analysis and thermal remote sensing of the Los Humeros Volcanic Complex: Implications for volcano  
527 structure and geothermal exploration, *J. Volcanol. Geoth. Res.*, 301, 221–237,  
528 <https://doi.org/10.1016/j.jvolgeores.2015.05.014>, 2015.

529 **Norini, G., Carrasco-Núñez, G., Corbo-Camargo, F., Lermo, J., Hernández Rojas, J., Castro, C., Bonini, M.,**  
530 **Montanari, D., Corti, G., Moratti, G., Chavez, G., Ramirez, M., and Cedillo F.: The structural architecture of the**  
531 **Los Humeros volcanic complex and geothermal field, *J. Volcanol. Geoth. Res.*, 381, 312-329.**  
532 **<https://doi.org/10.1016/j.jvolgeores.2019.06.010>, 2019.**

533 Matsumoto, A., and Nakagawa, M.: Formation and evolution of silicic magma plumbing system: Petrology of the  
534 volcanic rocks of Usu volcano, Hokkaido, Japan, *J. Volcanol. Geoth. Res.*, 196, 185–207,  
535 <https://doi.org/10.1016/j.jvolgeores.2010.07.014>, 2010.

536 Pribnow, D.F.C., Schütze, C., Hurter, S.J., Flechsig, C., Sass, J.H.: Fluid flow in the resurgent dome of Long Valley  
537 Caldera: Implications from thermal data and deep electrical sounding. *J. Volcanol. Geoth. Res.*, 127, 329–345,  
538 [https://doi.org/10.1016/S0377-0273\(03\)00175-6](https://doi.org/10.1016/S0377-0273(03)00175-6), 2003.

539 **Roche, O., Druitt, T.H., and Merle, O.: Experimental study of caldera formation, *J. Geophys. Res.*, 105,**  
540 **<https://doi.org/10.1029/1999JB900298>, 395-416, 2000.**

541 **Smith, R. L., and Bailey, R. A.: Resurgent cauldrons, *Geol. Soc. Am. Mem.*, 116, 613–662,**  
542 **<https://doi.org/10.1130/MEM116>, 1968.**

543 Stix, J., Kennedy, B., Hannington, M., Gibson, H., Fiske, R., Mueller, W., Franklin, J.: Caldera-forming processes and  
544 the origin of submarine volcanogenic massive sulfide deposits, *Geology*, 31, 375–378, [https://doi.org/10.1130/0091-7613\(2003\)031<0375:CFPATO>2.0.CO;2](https://doi.org/10.1130/0091-7613(2003)031<0375:CFPATO>2.0.CO;2), 2003.

545

546 **Swanson, E., and McDowell, F.: Geology and geochronology of the Tomoctic caldera, Chihuahua, Mexico, *Geol.***  
547 ***Soc. Am. Bull.*, 96, 1477-1482, [https://doi.org/10.1130/0016-7606\(1985\)96<1477:GAGOTT>2.0.CO;2](https://doi.org/10.1130/0016-7606(1985)96<1477:GAGOTT>2.0.CO;2), 1985.**

548 Tomiya, A., Takahashi, E., Furukawa, N., Suzuki, T.: Depth and evolution of a silicic magma chamber: Melting  
549 experiments on a low-K rhyolite from Usu volcano, Japan, *J. Petrol.*, 51, 1333–1354,  
550 <https://doi.org/10.1093/petrology/egg021>, 2010.

551 **Ueda, H., Nagai, M., and Tanada, T.: Phreatic eruptions and deformation of Ioto Island (Iwo-jima), Japan,**  
552 **triggered by deep magma injection, *Earth Planets Space*, 70, <https://doi.org/10.1186/s40623-018-0811-y>, 2018.**

553 Verma, M.P., Verma, S.P., and Sanvicente, H.: Temperature field simulation with stratification model of magma  
554 chamber under Los Humeros caldera, Puebla, Mexico, *Geothermics*, 19, 187–197, [https://doi.org/10.1016/0375-6505\(90\)90015-4](https://doi.org/10.1016/0375-6505(90)90015-4), 1990.

555

556 Verma, S.P., Gómez-Arias, E., and Andaverde, J.: Thermal sensitivity analysis of emplacement of the magma chamber  
557 in Los Humeros caldera, Puebla, Mexico, *Int. Geol. Rev.*, 53, 905–925, <https://doi.org/10.1080/00206810903234296>,  
558 2011.

559 Verma, S.P.: Magma genesis and chamber processes at Los Humeros caldera, Mexico - Nd and Sr isotope data, *Nature*,  
560 302, 52–55, <https://doi.org/10.1038/302052a0>, 1983.

561 Verma, S.P.: Geochemical evidence for a lithospheric source for magmas from Los Humeros caldera, Puebla, Mexico.  
562 *Chem. Geol.* 164, 35–60, [https://doi.org/10.1016/S0009-2541\(99\)00138-2](https://doi.org/10.1016/S0009-2541(99)00138-2), 2000.

563 **Walter, T.R., and Troll, V.R.: Formation of caldera periphery faults: an experimental study, *B. Volcanol.*, 63,**  
564 **191-203, <https://doi.org/10.1007/s004450100135>, 2001.**

565 **Walter, T.R., Wang, R., Acocella, V., Neri, M., Grosser, H., and Zschau, J: Simultaneous magma and gas eruptions**  
566 **at three volcanoes in southern Italy: an earthquake trigger ?, *Geology*, 37, 251–254,**  
567 **<https://doi.org/10.1130/G25396A>, 2009.**

568 **Wilcox, C.P.: Eruptive, magmatic and structural evolution of a large explosive caldera volcano, Los Humeros,**  
569 **Central Mexico, Ph.D. thesis, Department of Geology, University of Leicester, United Kingdom, 317 pp., 2011.**

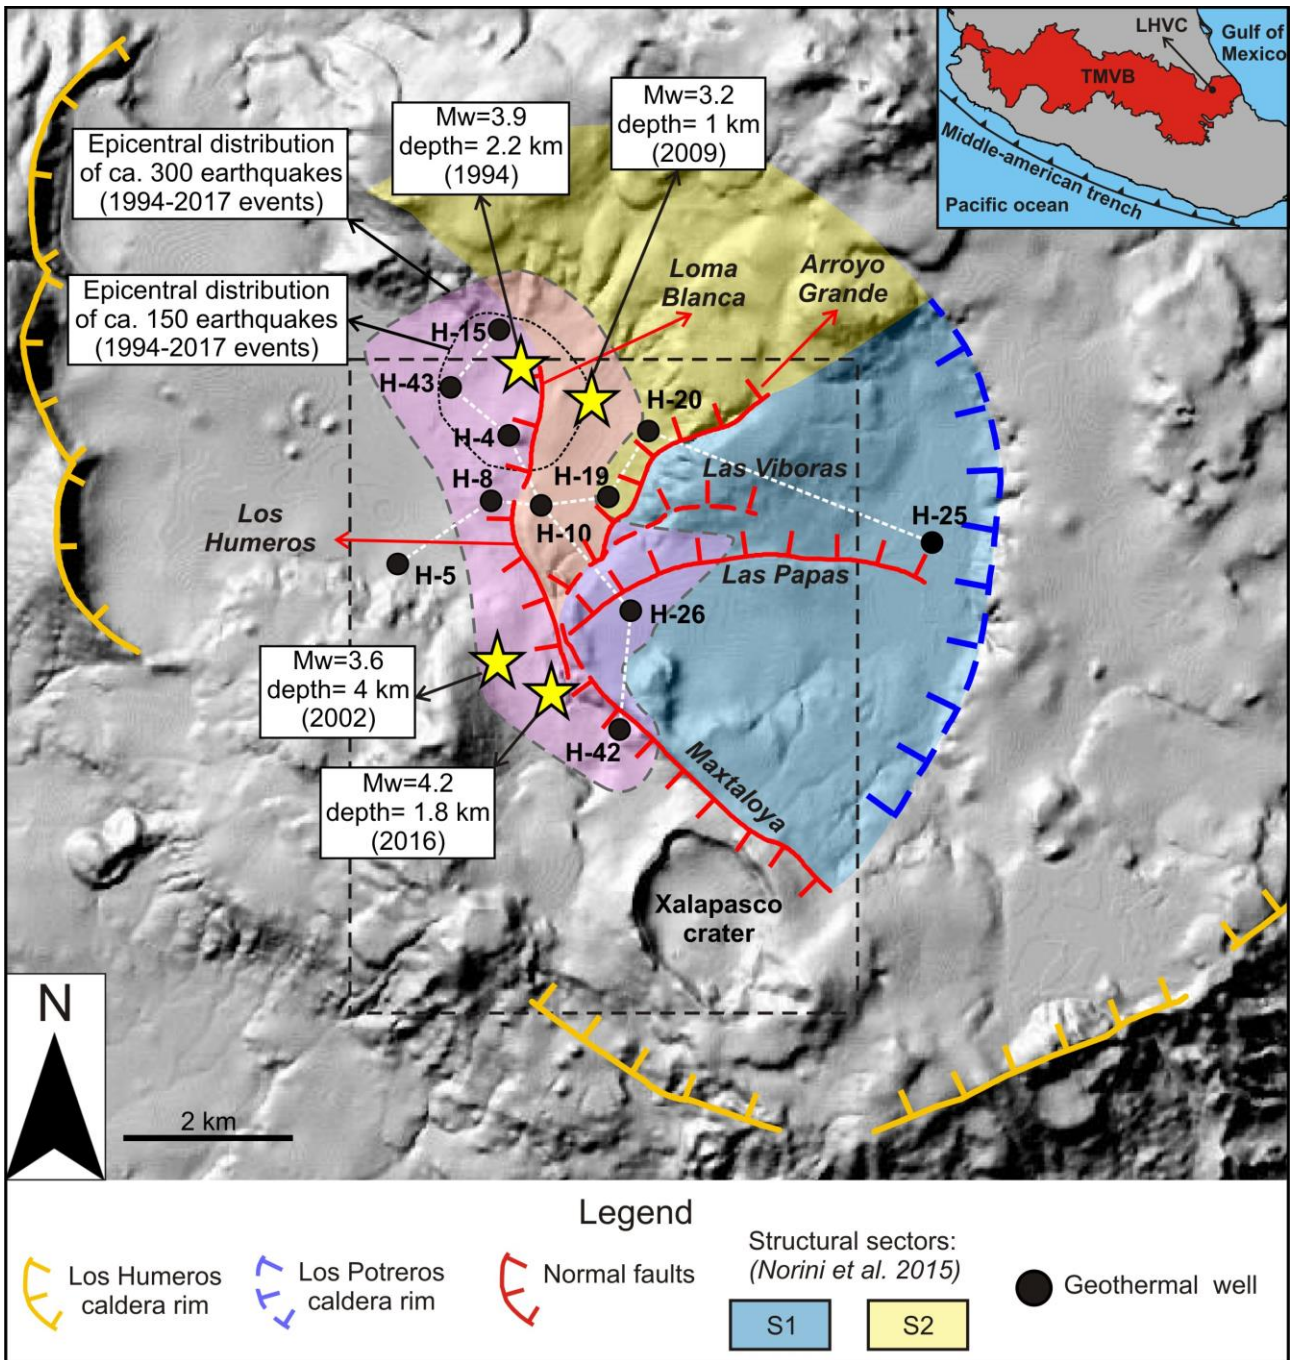

570  
 571 **Figure 1:** Shaded relief image (illuminated from the NE) obtained from 15 m resolution DEM of the Los Humeros Volcanic  
 572 Complex (LHVC) showing the main structural features (faults and caldera rim, modified from Norini et al. (2015); Calcagno  
 573 et al. (2018) and some geothermal wells referred in the text and in Figures 2a-b. The white dashed lines indicate the direction  
 574 of the correlation sections shown in Figures 2a-b. The black rectangle indicates the studied area within the Los Potreros  
 575 Caldera shown in Figure 4. The Inset box show the location of the LHVC (black dot and arrow) within the eastern sector of  
 576 the Trans Mexican Volcanic Belt (TMVB). The structural sectors S1 and S2 correspond to the resurgent block inferred by  
 577 Norini et al. (2015). Seismicity data from Lermo et al. (2018).

578  
 579  
 580  
 581  
 582



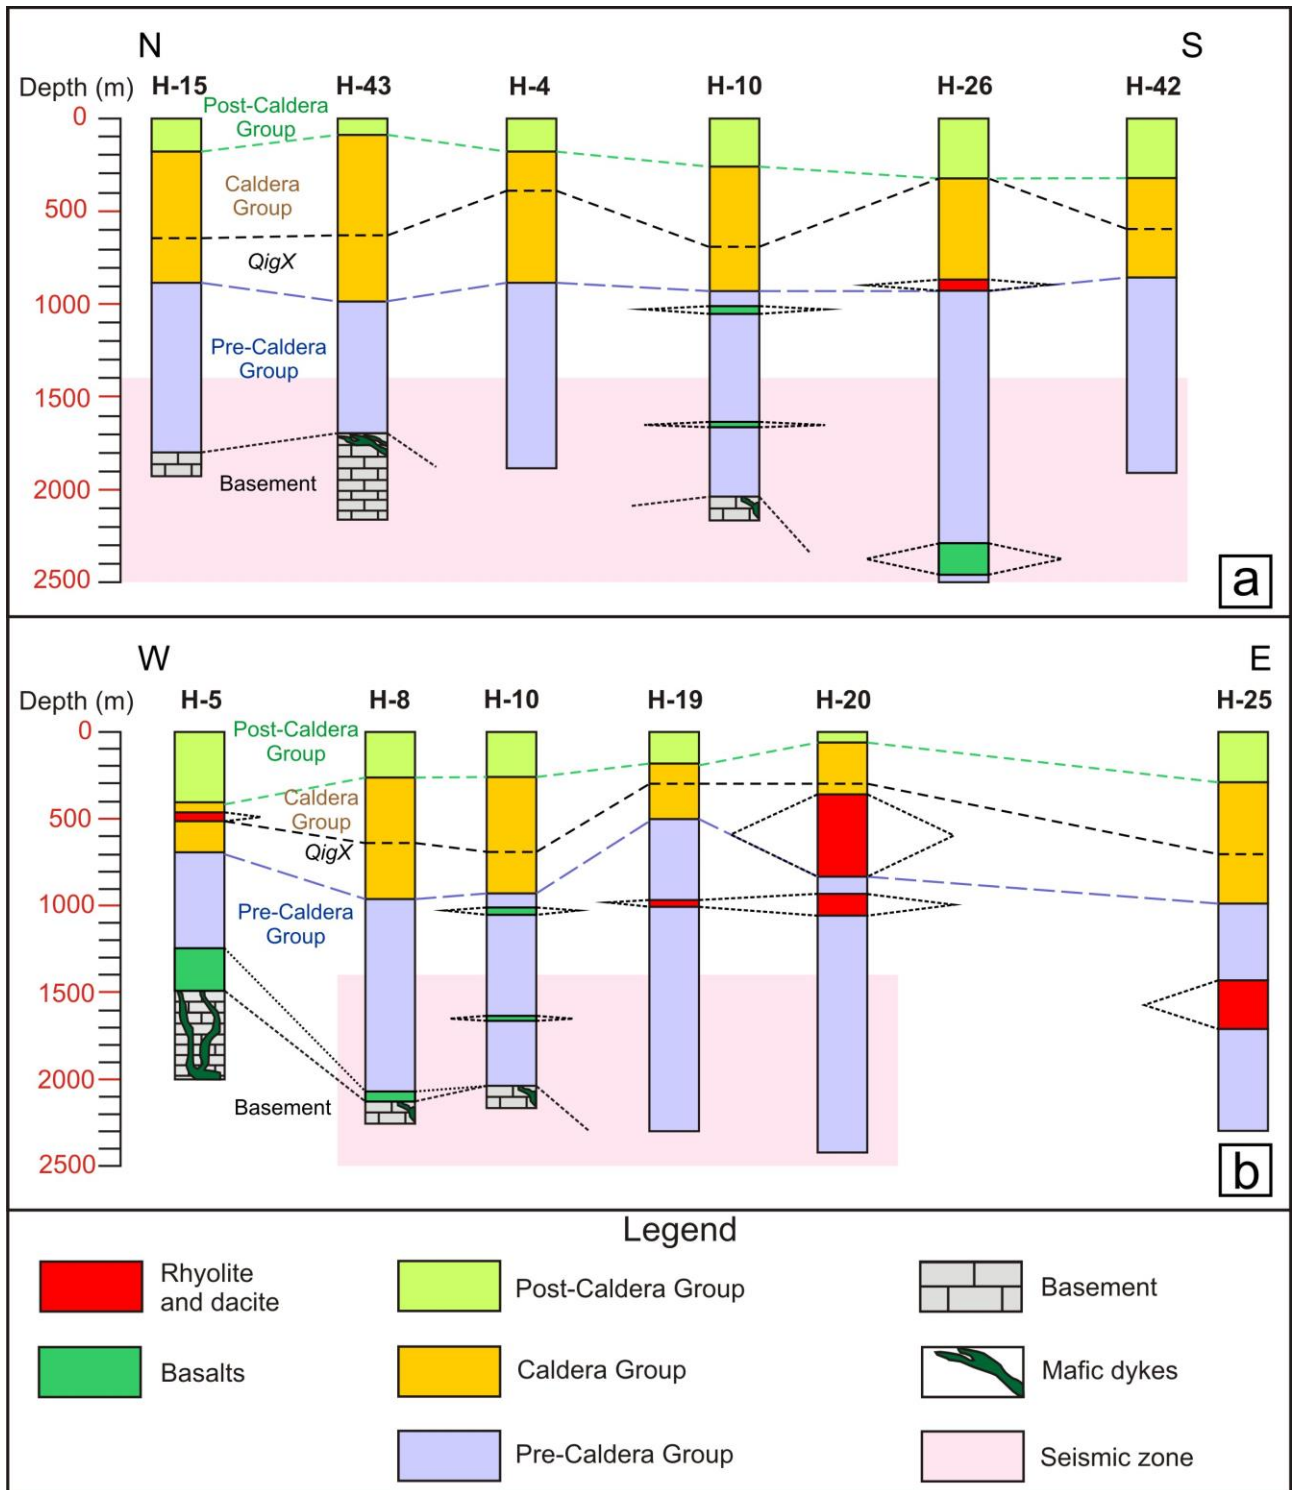

583  
584  
585  
586

**Figure 2: In depth correlation of lithostratigraphic units along the N-S (a) and W-E (b) direction (redrawn after Carrasco-Núñez et al. (2017a) and Arellano et al. (2003). Depth:horizontal distance=1:1. Location of the correlation line is shown in Figure 1. QigX= Xaltipan ignimbrite.**

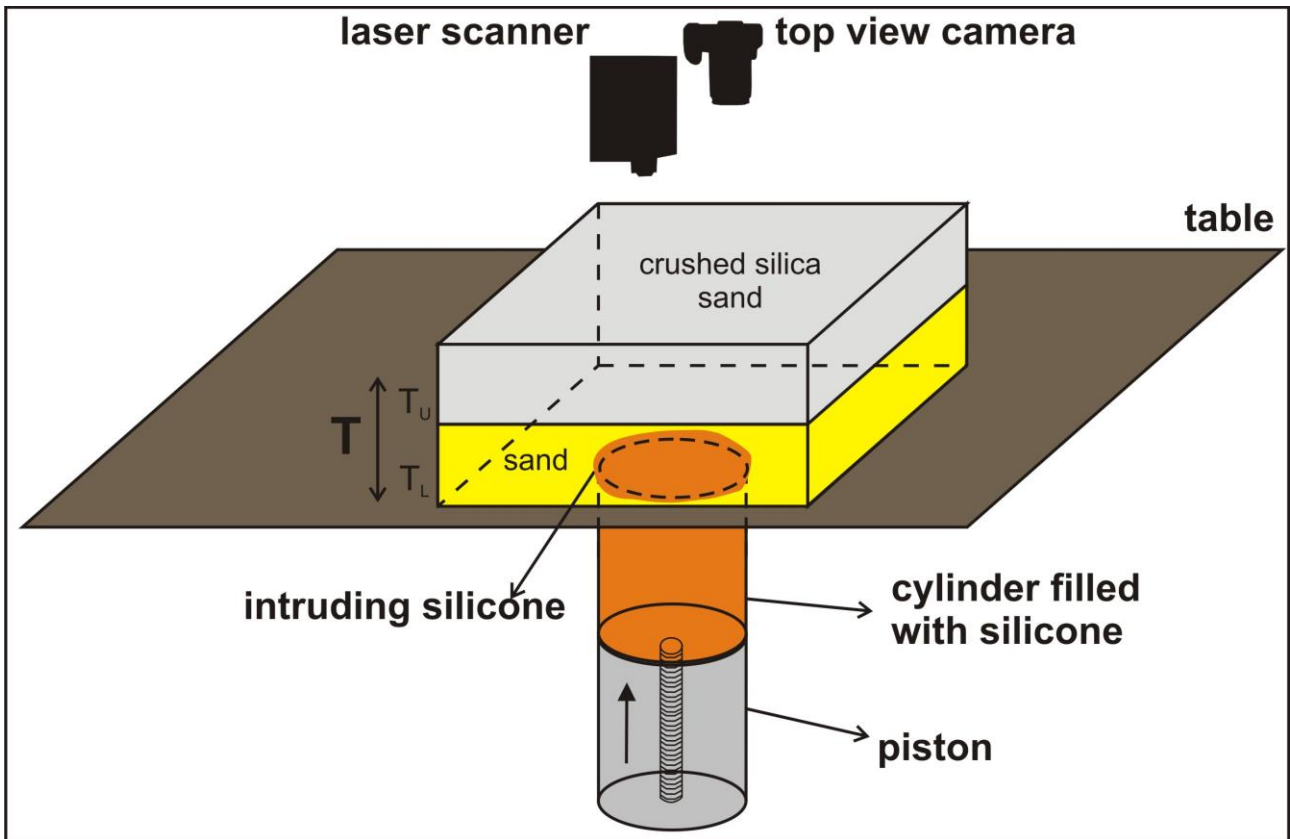

587  
 588  
 589  
 590  
 591  
 592  
 593  
 594  
 595  
 596  
 597  
 598  
 599  
 600  
 601  
 602  
 603  
 604  
 605  
 606  
 607  
 608  
 609  
 610

**Figure 3: Experimental set-up. A motor controlled piston pushes upward the silicone at a fixed rate (2mm/hr) from the base of the layered sand pack (the diameter of the silicone is 8 cm). A laser scanner and a camera record the surface deformation induced by the intruding silicone. T= total overburden thickness.  $T_U$ = upper layer thickness,  $T_L$ = lower layer thickness.**

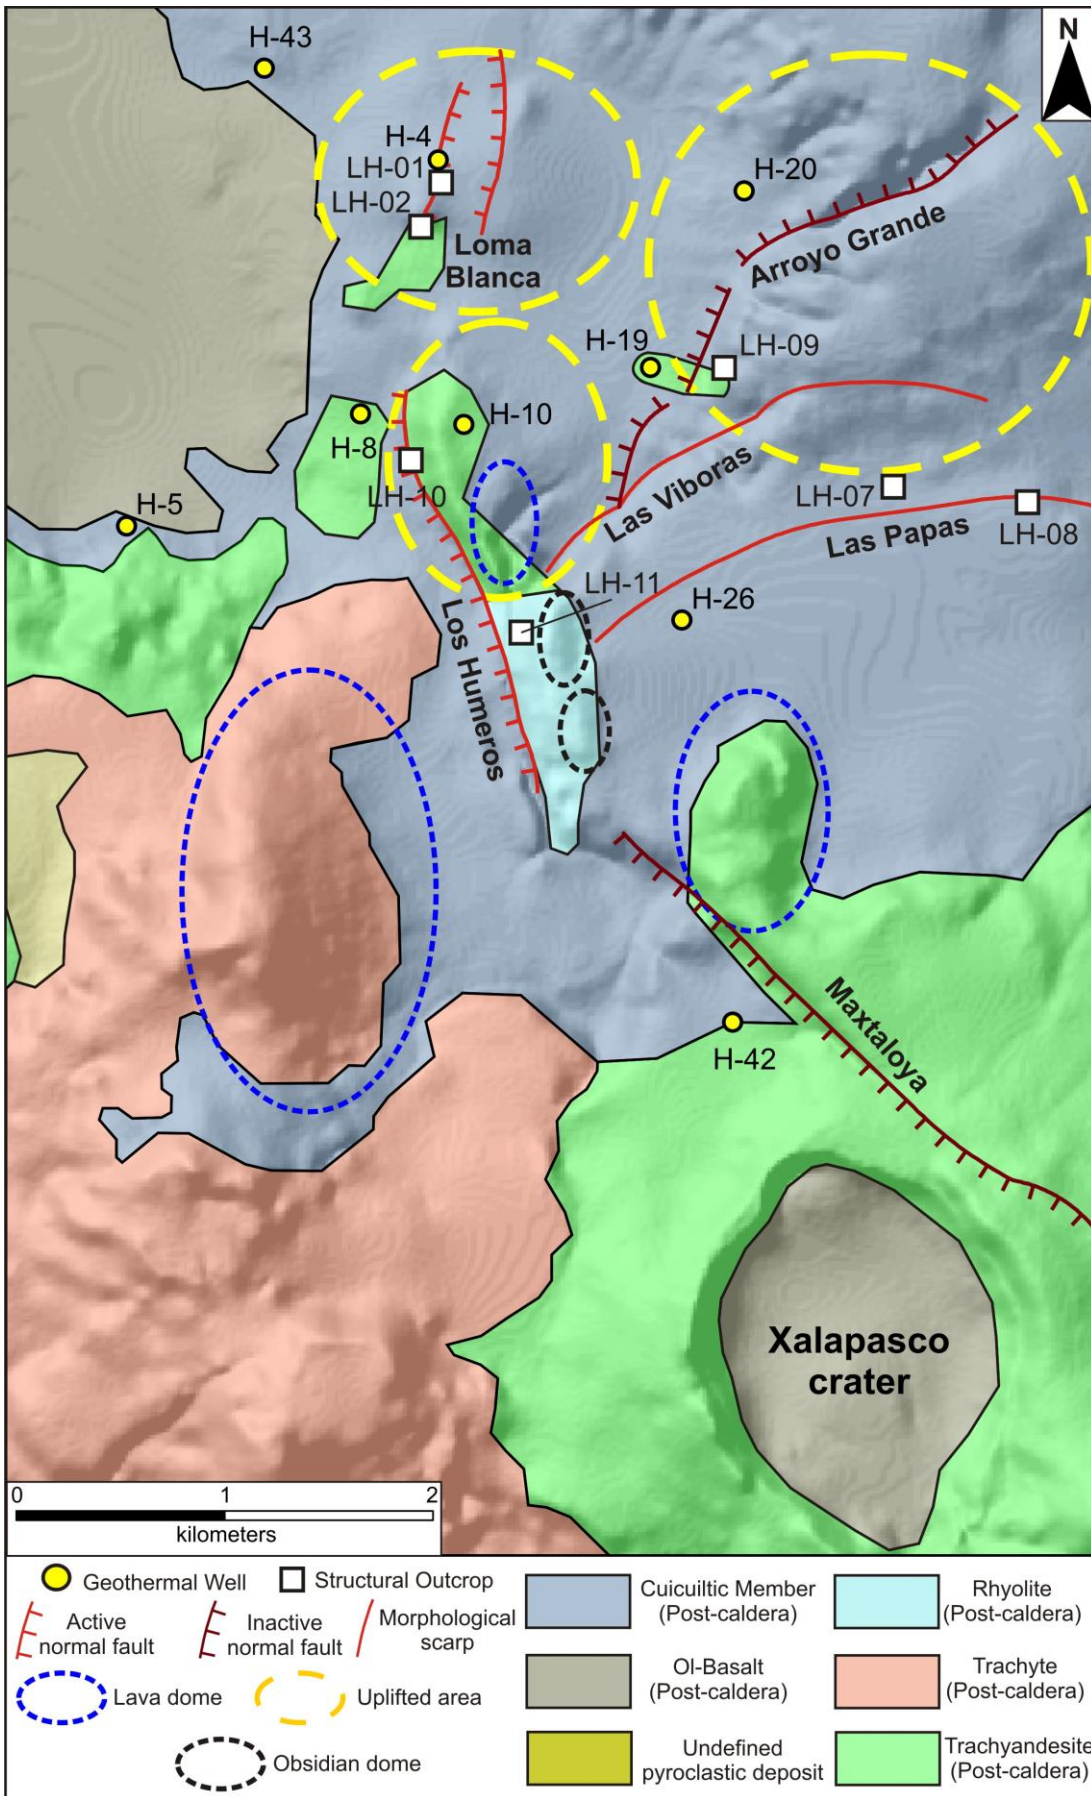

611  
612 **Figure 4:** Simplified geological structural map of the studied area; reinterpreted after (Norini et al., 2015; Carrasco- Núñez et  
613 al., 2017b; Calcagno et al., 2018).

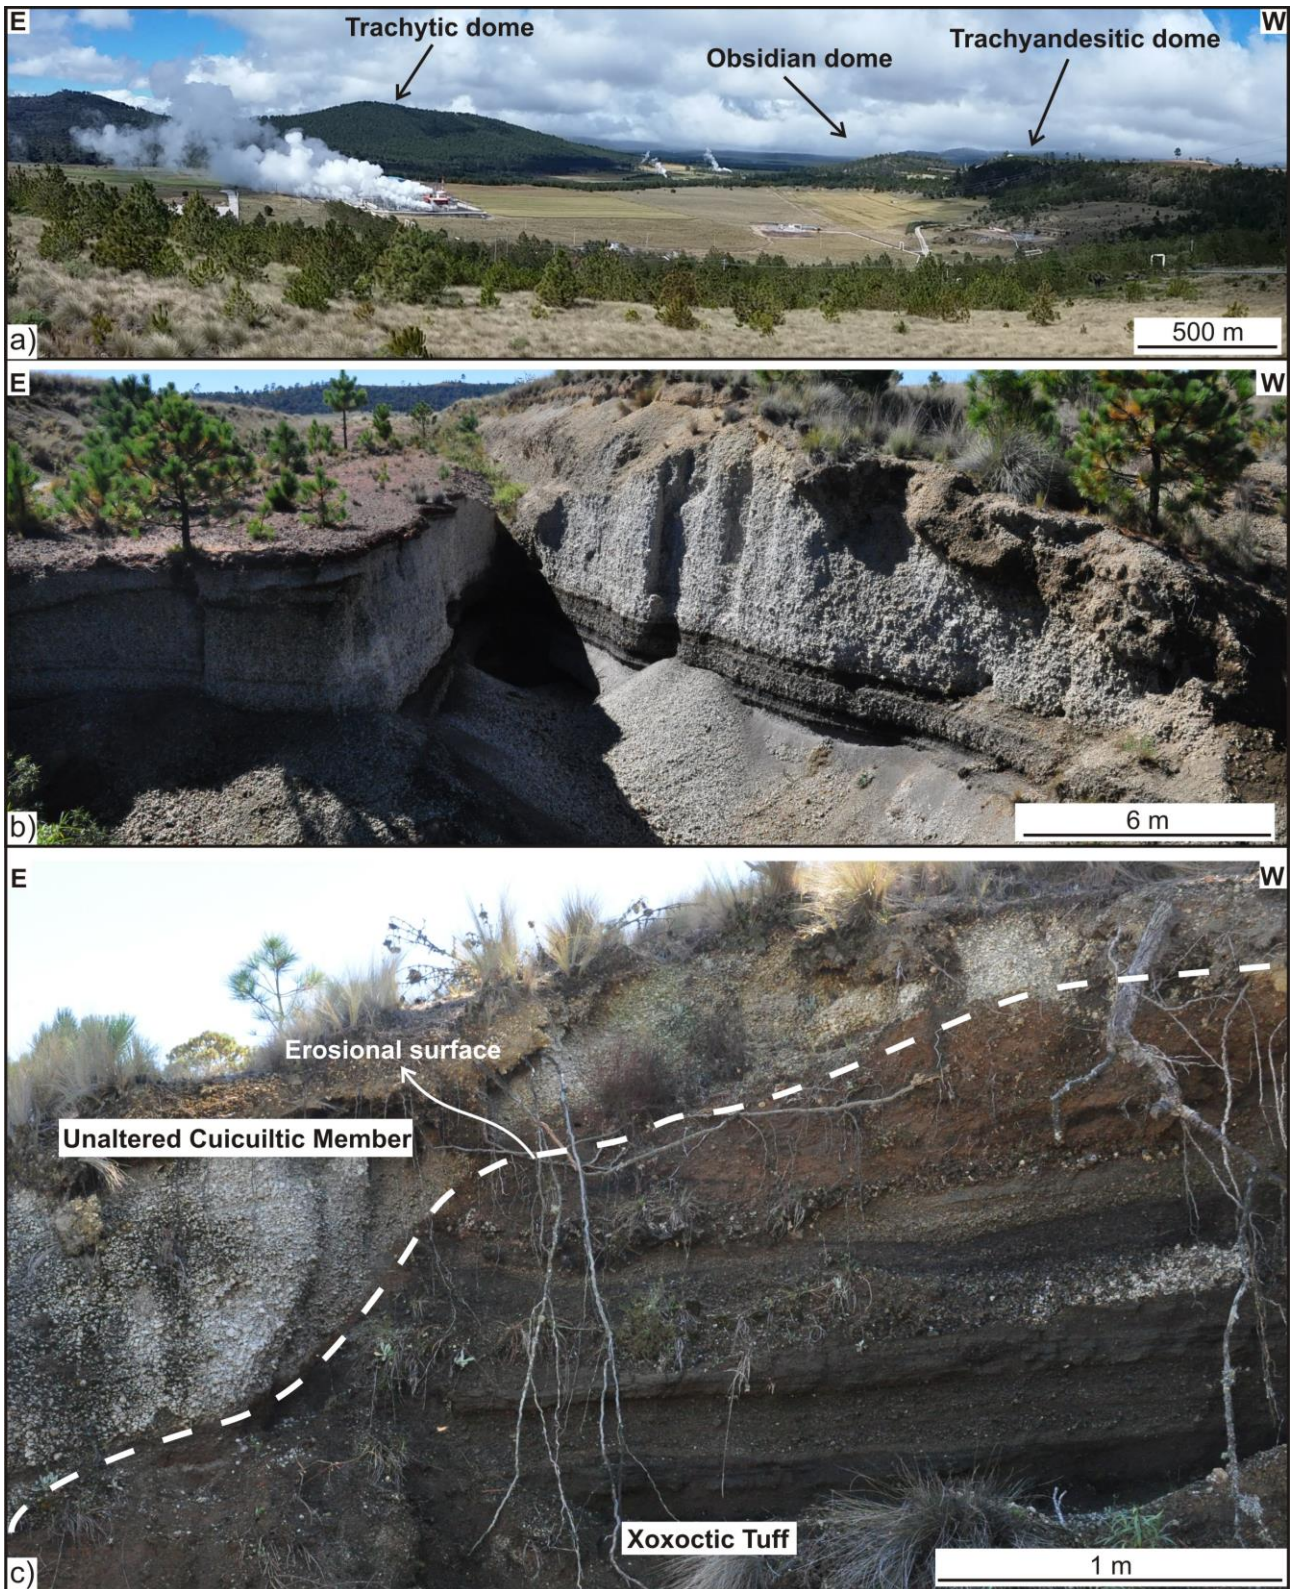

614  
 615 **Figure 5:** a) Panoramic view from Xalapasco crater (looking towards N) of the lava domes aligned N-S. b) Unaltered  
 616 **Cuicuiltic Member (LH-07).** c) Unaltered Cuicuiltic **Member** covering a layered pyroclastic deposit, **which can be laterally**  
 617 **correlated with the Xoxoctic Tuff (LH-08).** The erosional surface preceding the deposition of the Cuicuiltic **Member** is shown  
 618 (dashed white line).

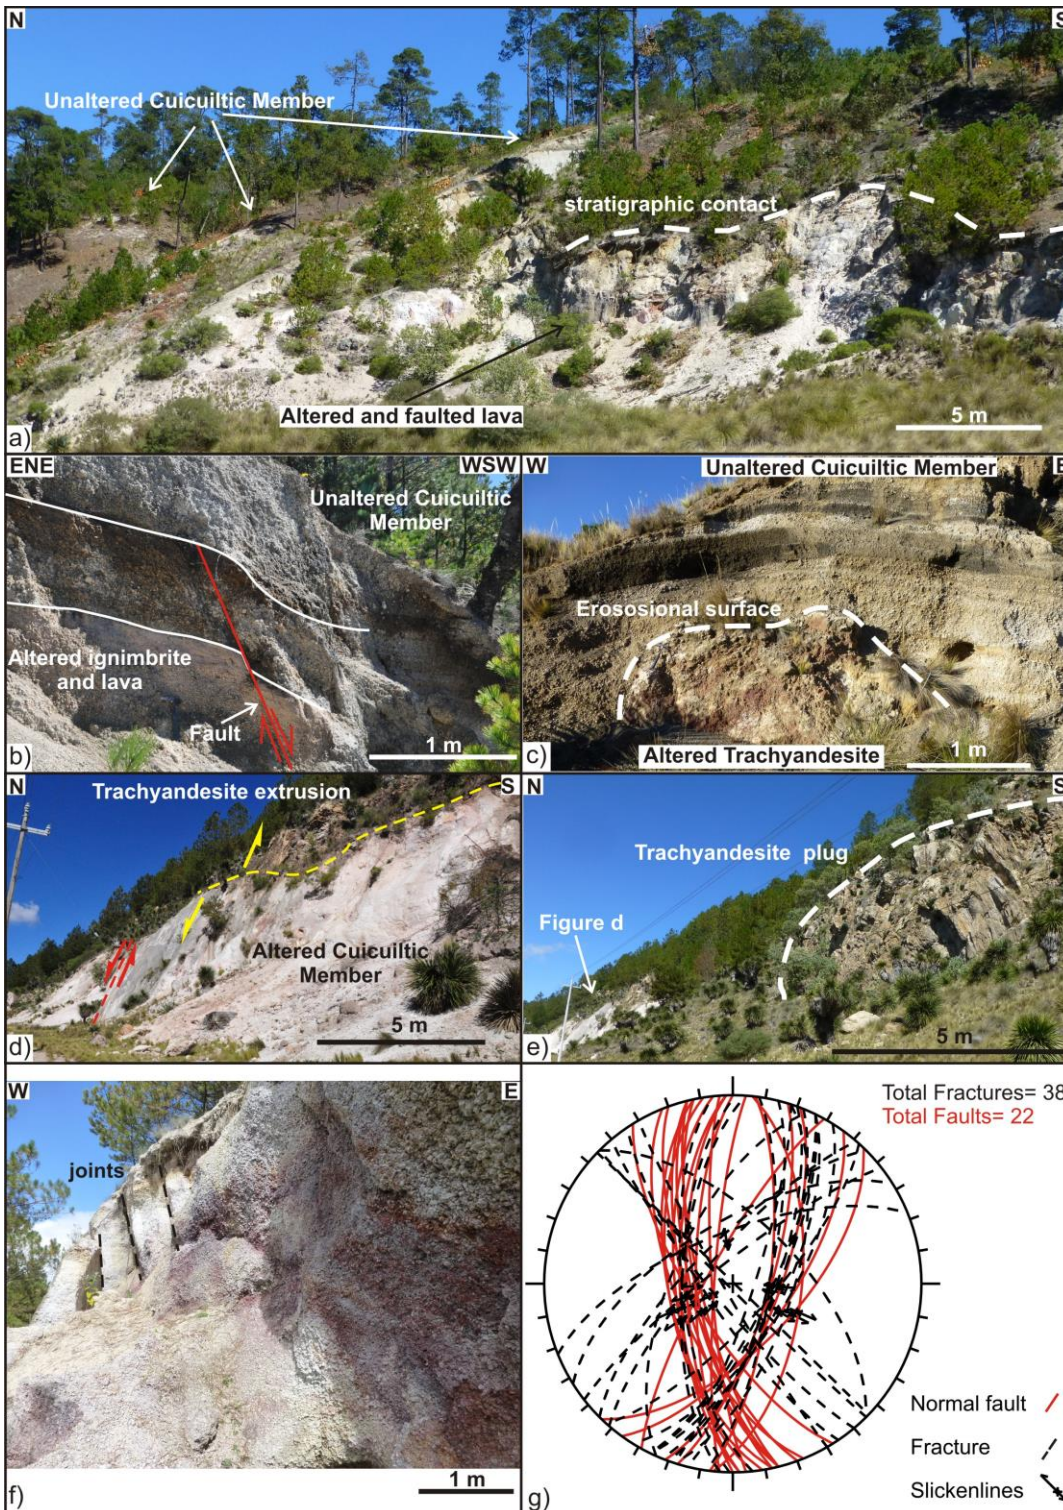

619  
 620 **Figure 6:** a) Panoramic view of the Arroyo Grande fault scarp showing the unaltered Cuicuiltic **Member** covering the altered  
 621 and faulted ignimbrite and lavas (**site LH-09**). b) Normal fault affecting the altered ignimbrite deposits unconformably  
 622 covered by the post-caldera, unaltered Cuicuiltic **Member** deposits (LH-09). Note that the Cuicuiltic **Member** deposits are  
 623 not faulted at this location; the fault can be thus considered as a fossil fault with respect to the Cuicuiltic **Member** deposition.  
 624 c) Block of altered trachyandesite buried by unaltered Cuicuiltic **Member** layers along the Maxtaloya fault scarp. d) Los  
 625 Humeros fault scarp (LH-10) induced by the ascent of the **trachyandesitic** extrusion on top of the fault plane. e)  
 626 **Trachyandesite** plug cropping out ~150 southward the fault scarp shown in d) (indicated by the red arrow). f) **Jointing**  
 627 and alteration of the Cuicuiltic **Member** within the apical **depression** of the Loma Blanca dome (LH-01). e) Equal-area stereo-plot  
 628 of the attitudes of faults and fractures in all the structural outcrops.

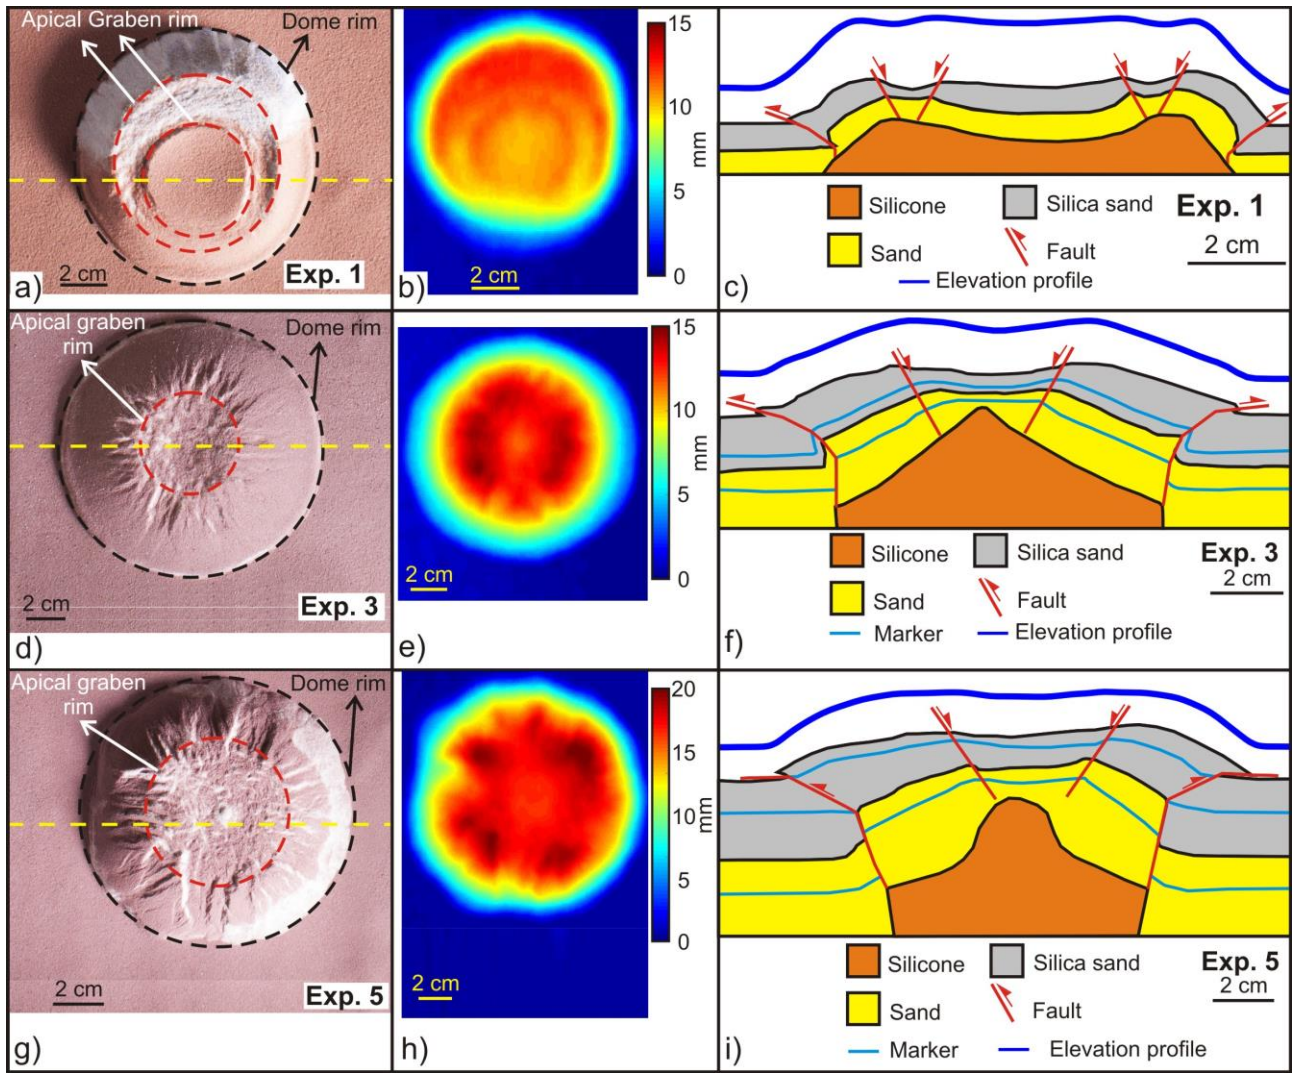

629  
630  
631  
632  
633  
634  
635  
636  
637  
638  
639  
640  
641  
642  
643  
644  
645  
646  
647

**Figure 7:** a) d) g) Top view image of the experiments 1, 3 and 5. b) e) h) cumulative vertical displacement; colour scale is proportional to the amount of uplift. c) f) i) Drawing of the cross section view obtained after cutting the section close to the dome center. The elevation profiles are obtained from laser scanner data. The yellow dashed line in a) d) g) indicates the trace of the section views and of the elevation profiles.

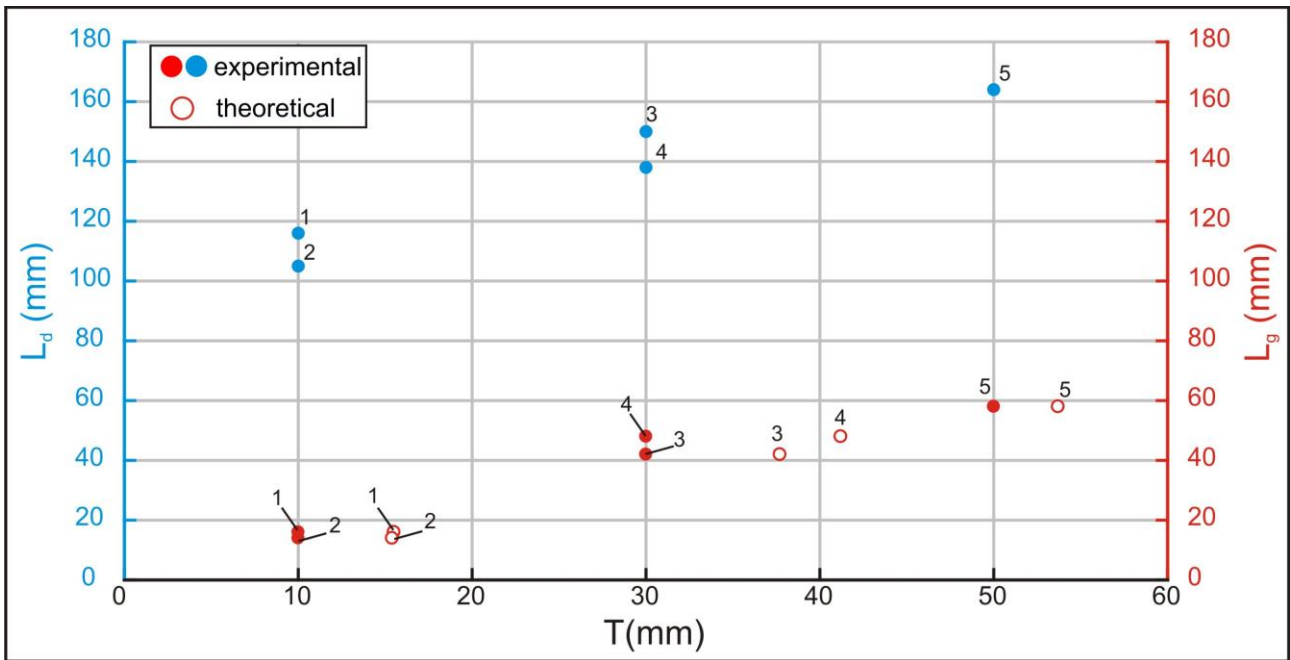

648

649

650

**Figure 8:  $L_g$  (apical depression width) and  $L_d$  (dome diameter) versus  $T$  (overburden thickness). Theoretical values calculated after equation 1 (see discussion section). The numbers above each point indicate the experiment number.**

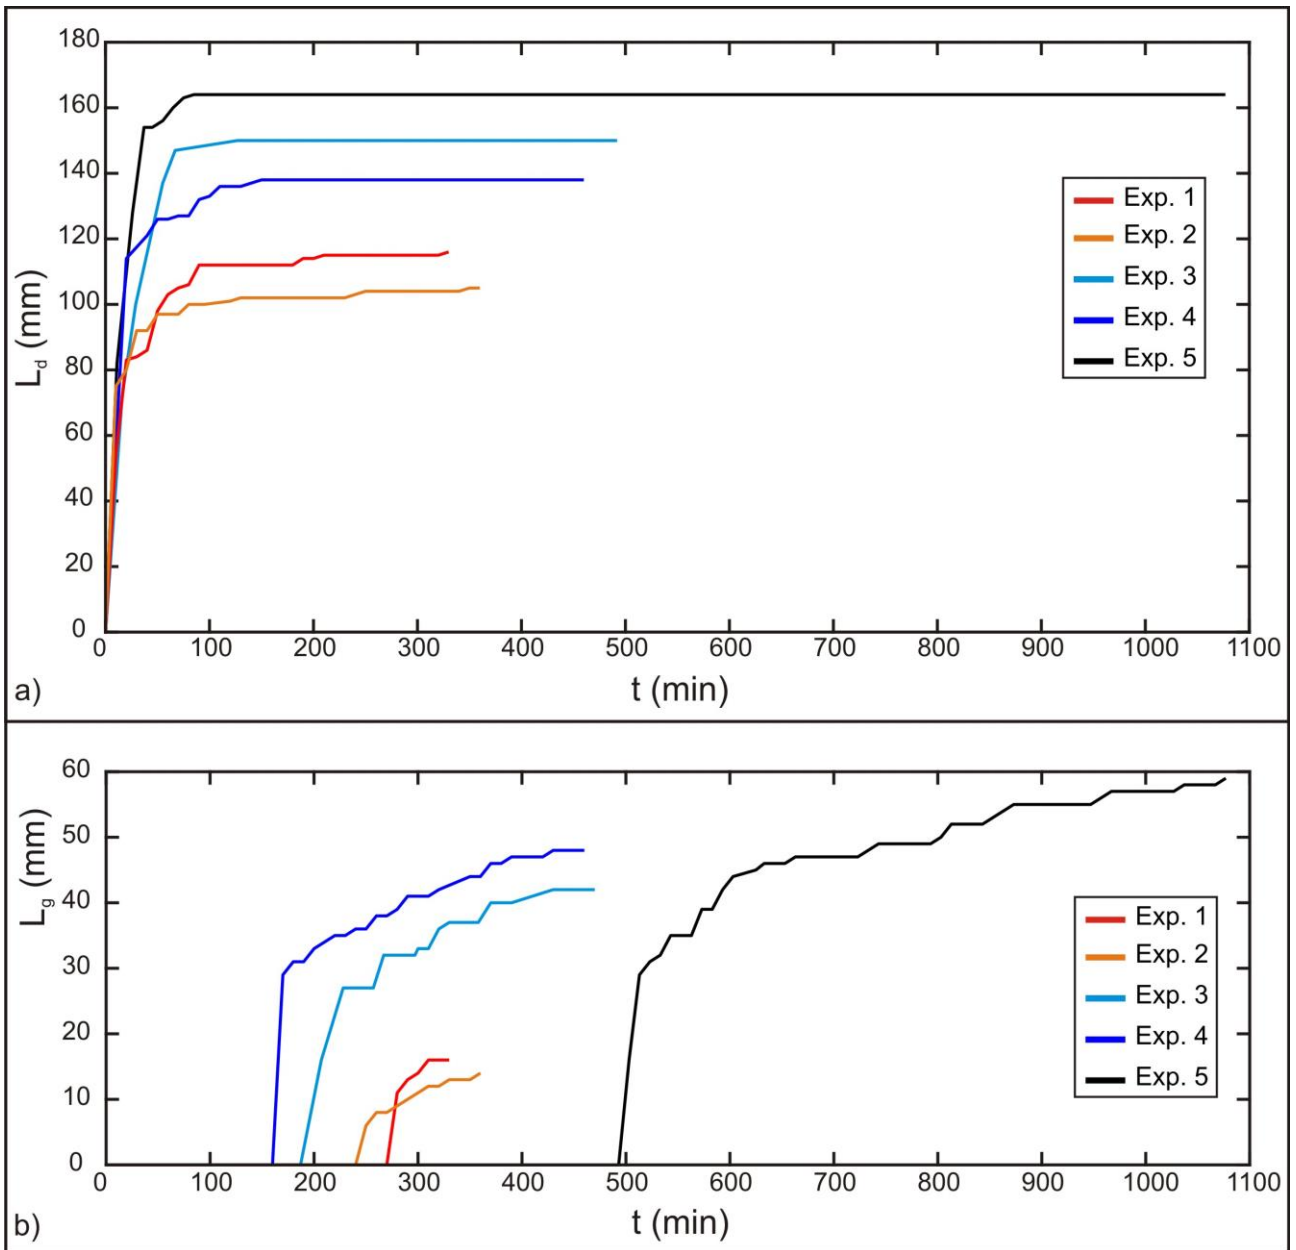

651  
 652 **Figure 9: a) Time evolution of the dome diameter ( $L_d$ ). b) Time evolution of the apical depression width ( $L_g$ ). Both  $L_d$  and  $L_g$**   
 653 **show a similar evolution trend with a first stage of abrupt increase at the beginning of each experiment. In the second stage**  
 654  **$L_d$  becomes constant at  $t \sim 90$  min (experiments 1-2-3),  $t \sim 150$  min (experiment 4) and  $t \sim 65$  min (experiment 5) while  $L_g$**   
 655 **increases slightly from  $t \sim 250$ -280 min (experiments 1-2),  $t \sim 210$  min and  $\sim 170$  min (experiments 3 and 4) and  $t \sim 530$  min**  
 656 **(experiment 5) till the end of the experiment.**  
 657  
 658  
 659  
 660  
 661  
 662  
 663  
 664  
 665  
 666



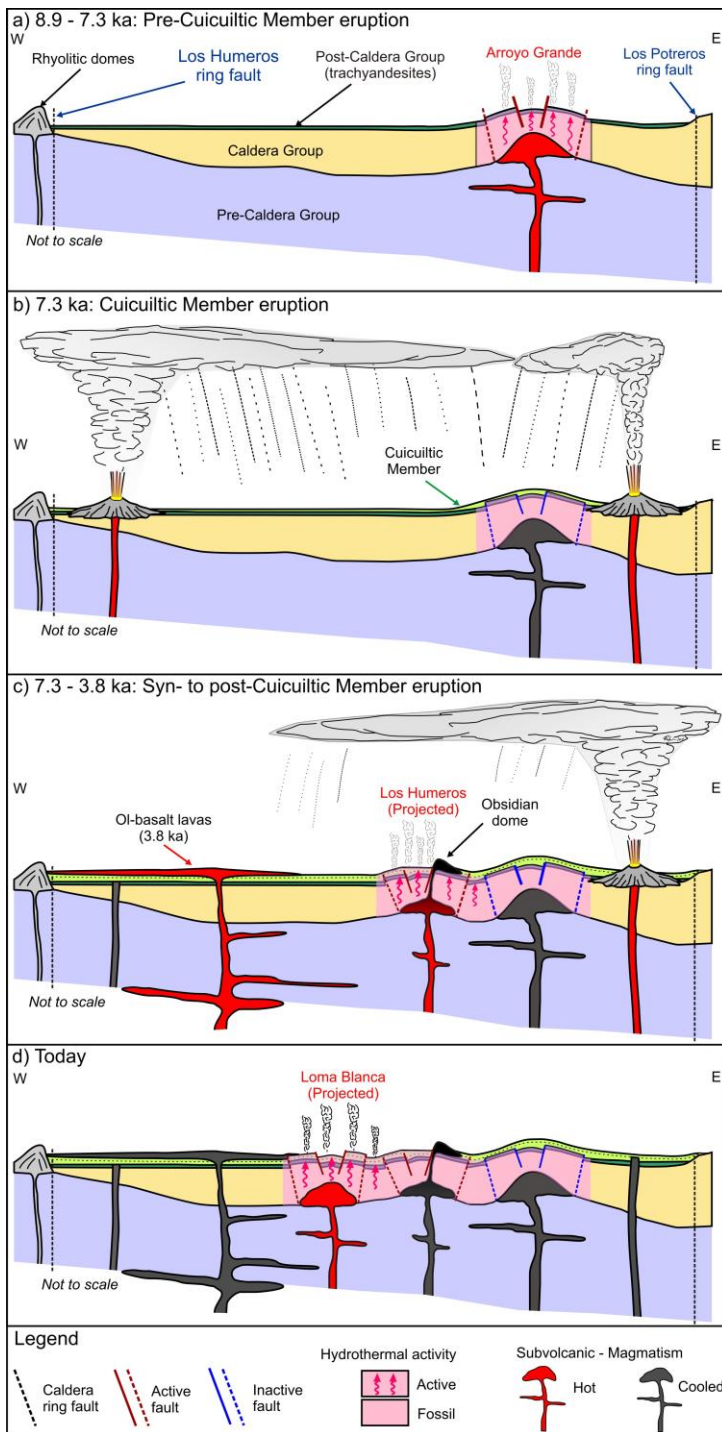

667

668

669

670

671

672

673

674

675

676

677

678

**Figure 10:** Schematic model of the evolution of the sub-surface structure of the Los Potreros caldera floor. Multiple magmatic intrusions located at relatively shallow depth (< 1 km) are responsible for the localized bulging of the caldera floor (Loma Blanca, Los Humeros and Arroyo Grande uplifted areas). a) Pre Cuicuiltic **Member eruption**: emplacement of a felsic intrusion at shallow depth and formation of the Arroyo grande bulge characterized by extensional faulting at its top, reverse faulting at its base and hydrothermalism. b) Cuicuiltic **Member eruption**: eruption of the Cuicuiltic **Member** covering the hydrothermally altered post-caldera trachyandesitic lavas. c) Syn to post Cuicuiltic **Member eruption**: formation of the Los Humeros fault and extrusion of obsidian lava domes along the fault scarp. As the trachyandesitic domes are covered with Cuicuiltic **Member** only at his base, the lava extrusion occurred during and post the Cuicuiltic **Member** eruption. d) Formation of the Loma Blanca bulge with the current hydrothermal activity and extensional faulting occurring within the apical depression. Notice that the emplacement of the successive most recent domes (Los Humeros and Loma blanca) are not aligned on the same plane, they are shown for practical purposes.

| Stage               | Age (ka)       | Main stratigraphic units                                       |
|---------------------|----------------|----------------------------------------------------------------|
| <b>Post-caldera</b> | <b>&lt; 69</b> | <b>Cuicuiltic Member and trachyandesitic to basaltic lavas</b> |
|                     |                | <b>Llano Tuff</b>                                              |
|                     |                | <b>Xoxoctic Tuff</b>                                           |
|                     |                | <b>Rhyolitic domes</b>                                         |
| <b>Caldera</b>      | <b>164-69</b>  | <b>Zaragoza ignimbrite</b>                                     |
|                     |                | <b>Faby Tuff</b>                                               |
|                     |                | <b>Xaltipan ignimbrite</b>                                     |
| <b>Pre-Caldera</b>  | <b>700-164</b> | <b>Rhyolitic Domes</b>                                         |

679 **Table 1 Summary of the main stratigraphic units of the three evolutionary stages of the Los Humeros Volcanic complex**  
680 **(Carrasco-Núñez et al., 2017b, 2018).**

| Parameter      | Definition                             | Value (experiments)              | Value (nature)                 |
|----------------|----------------------------------------|----------------------------------|--------------------------------|
| T              | Thickness of <b>the overburden</b>     | <b>1-5 X 10<sup>-2</sup> m</b>   | <b>300-2000 m</b>              |
| L <sub>d</sub> | <b>Dome diameter</b>                   | 1-1.6 X 10 <sup>-1</sup> m       | <b>2000 m</b>                  |
| H              | Dome height                            | <b>1.1-2 X 10<sup>-2</sup> m</b> | <b>100 m</b>                   |
| ρ <sub>s</sub> | <b>Density of brittle overburden</b>   | 1400 kg/m <sup>3</sup>           | <b>2800 kg/m<sup>3</sup></b>   |
| φ              | Angle of internal friction             | 35°                              | <b>25-40°</b>                  |
| τ <sub>0</sub> | Cohesion ( <b>brittle overburden</b> ) | 300 Pa                           | <b>10<sup>6</sup> Pa</b>       |
| ρ <sub>m</sub> | <b>Density of intrusive material</b>   | 1000 kg/m <sup>3</sup>           | <b>2500 kg/m<sup>3</sup></b>   |
| μ <sub>m</sub> | <b>Viscosity of intrusive material</b> | 10 <sup>4</sup> Pa s             | <b>10<sup>15</sup> Pa s</b>    |
| g              | Gravity                                | 9.8 m/s <sup>2</sup>             | <b>9.8 m/s<sup>2</sup></b>     |
| t              | <b>Timespan for deformation</b>        | 2.8-6.5 X 10 <sup>4</sup> s      | <b>1.9 X 10<sup>12</sup> s</b> |

681 **Table 2. Comparison of the geometric and material properties parameters of the experiments and nature.**

| Dimensionless ratio                                             | Experiments             | Nature                        |
|-----------------------------------------------------------------|-------------------------|-------------------------------|
| Π <sub>1</sub> = T/L <sub>d</sub>                               | <b>0.1-0.5</b>          | <b>0.15-1</b>                 |
| Π <sub>2</sub> = H/L <sub>d</sub>                               | <b>0.08-0.2</b>         | <b>0.05-0.1</b>               |
| Π <sub>3</sub> = ρ <sub>s</sub> /ρ <sub>m</sub>                 | 1.4                     | <b>1.12</b>                   |
| Π <sub>4</sub> = φ                                              | 35                      | 25-40                         |
| Π <sub>5</sub> = ρ <sub>m</sub> H <sup>2</sup> /μ <sub>mt</sub> | 6.1 X 10 <sup>-10</sup> | <b>1.3 X 10<sup>-20</sup></b> |
| Π <sub>6</sub> = ρ <sub>m</sub> gHt/μ <sub>m</sub>              | 1.3 X 10 <sup>3</sup>   | <b>4.6 X 10<sup>3</sup></b>   |
| Π <sub>7</sub> = ρ <sub>s</sub> gT/τ <sub>0</sub>               | <b>2.3</b>              | 8.24                          |

682 **Table 3. Definition and values of the dimensionless ratios Π in nature and in the experiments.**

| Exp      | T (mm)    | L <sub>g</sub> (mm) | L <sub>d</sub> (mm) | θ          | α          | T <sub>t</sub> (mm) | σ (%)     |
|----------|-----------|---------------------|---------------------|------------|------------|---------------------|-----------|
| <b>1</b> | <b>10</b> | <b>16</b>           | <b>116</b>          | <b>58°</b> | <b>14°</b> | <b>15.5</b>         | <b>55</b> |
| <b>2</b> | <b>10</b> | <b>14</b>           | <b>105</b>          | <b>63°</b> | <b>27°</b> | <b>15.4</b>         | <b>54</b> |
| 3        | 30        | 42                  | 150                 | 58°        | 14°        | 37.7                | 27        |
| 4        | 30        | 48                  | 138                 | 56°        | 18°        | 41.2                | 37        |
| 5        | 50        | 58                  | 164                 | 58°        | 21°        | 53.7                | 7         |

683 **Table 4. Measured (L<sub>g</sub>, L<sub>d</sub>, θ, α) and imposed (T) parameters in the experiments. T=overburden thickness; L<sub>d</sub>= dome**  
684 **diameter; L<sub>g</sub>= apical depression width; θ= apical depression fault dip; α= dome flank mean dip; T<sub>t</sub>= theoretical overburden**

685 thickness calculated with equation 1 (Brothelände and Merle, 2015, see discussion section);  $\sigma$ = percentage difference between  
686 T and  $T_c$ .
